# Supplementary material for: The Longitudinal Association Between Health and Labour Market Participation: A Study of English Millennials
Source: Research Square preprint supplement (doi:10.21203/rs.3.rs-6974078/v1), 2025-07-02
Supplement: Supplementary file 1 [file 20053cafa7940b370f606757.docx]

# Supplementary material

## Additional covariates for the sensitivity analysis

**Economic activity at age 25:** The cohort members were asked about their current main employment activity at age 25. Using this question, we were able to derive their economic activity, categorising respondents into three groups: employed, unemployed, and inactive. This same question was asked at age 32, and the same method was applied.

**Long-term illness at age 32:** The cohort members were asked if they had any long-term physical or mental health conditions lasting or expected to last 12 months (1 = yes, 0 = no) at age 32.

**Self-rated general health at age 32:** At age 32, the cohort members were asked to rate their current general health on a scale from 1 (Excellent) to 5 (Poor). We also dichotomised the answer into good (0, those who reported 'good', 'very good', or 'excellent') and bad (1, those who reported 'fair' or 'poor').

**Mental health at age 32:** Mental health is also measured by GHQ and dichotomised into good (0) and poor (1) using the same method as mental health at other life stages (see main text).

**Highest achieved qualification:** The participants were asked to report their highest achieved educational qualification, which was categorised as 1 = having a degree or higher or 0 = not having a degree.

## Descriptive results

|  |  | **All** | **Economic Activity (32)** | | |
| --- | --- | --- | --- | --- | --- |
|  |  |
|  |  | **Employed** | **Unemployed** | **Inactive** |
| **Having a degree (32), N(%)** | **Not having a degree** | 9238(57.3) | 8008(55.3) | 323(76.5) | 906(74.8) |
| **Having a degree or above** | 6884 (42.7) | 6480(44.7) | 99(23.5) | 305(25.2) |
| **Economic activity at 25, N(%)** | **Employed** | 13867 (86) | 12965 (89.5) | 237(56.1) | 665(54.9) |
| **Unemployed** | 711(4.4) | 506(3.5) | 142(33.5) | 63(5.2) |
| **Inactive** | 1544(9.6) | 1017(7) | 44(10.4) | 483(39.9) |
| **Long-term illness (32), N(%)** | **No** | 12937(80.2) | 12026(83) | 240(56.7) | 671(55.4) |
| **Long-term illness** | 3185(19.8) | 2462(17) | 183(43.3) | 540(44.6) |
| **Self-rated general health (32), N(%)** | **Good** | 14560(90.3) | 13394(92.4) | 301(71.2) | 865(71.4) |
| **Poor** | 1562(9.7) | 1094(7.6) | 122(28.8) | 346(28.6) |
| **Mental health (32), N(%)** | **Good** | 12502(77.5) | 11512(79.5) | 239(56.5) | 751(62) |
| **Poor** | 3620(22.5) | 2976(20.5) | 184(43.5) | 460(38) |
| **Total N(%)** |  | 16122(100) | 14488(90) | 423(2.5) | 1211(7.5) |

## Correlation between earlier health and age 32 health

| **Long-term illness** | | | | |
| --- | --- | --- | --- | --- |
|  | **Childhood** | **Adolescence** | **Early adulthood** | **Adulthood** |
| **Childhood** | 1 | 0.62*** | 0.43*** | 0.37*** |
| **Adolescence** |  | 1 | 0.47*** | 0.37*** |
| **Early adulthood** |  |  | 1 | 0.69*** |
| **Adulthood** |  |  |  | 1 |
| **Self-rated general health** | | | | |
|  | **Childhood** | **Adolescence** | **Early adulthood** | **Adulthood** |
| **Childhood** | 1 | 0.38*** | 0.43*** | 0.45*** |
| **Adolescence** |  | 1 | 0.28*** | 0.21*** |
| **Early adulthood** |  |  | 1 | 0.67*** |
| **Adulthood** |  |  |  | 1 |
| **Mental health** | | | | |
|  | **Childhood** | **Adolescence** | **Early adulthood** | **Adulthood** |
| **Childhood** | 1 | 0.51*** | 0.30*** | 0.24*** |
| **Adolescence** |  | 1 | 0.37*** | 0.28*** |
| **Early adulthood** |  |  | 1 | 0.41*** |
| **Adulthood** |  |  |  | 1 |

*****p = .001, **p = .01, *p = .05**
