# Supplementary material for: The Longitudinal Association Between Health and Labour Market Participation: A Study of English Millennials
Source: Research Square preprint supplement (doi:10.21203/rs.3.rs-6974078/v1), 2025-07-02
Supplement: Supplementary file 2 [file 6ee67e435d3ded5a112deb45.xlsx]

## Sheet: supplimentary Table 1
Variable (age)	Missing Rate (%)
Gender (14/17 for boost)	2.21
Ethnicity (14/17 for boost)	0.16
Education (32)	55.86
Mother's education (13)	11.87
Father's education (13)	37.99
Mother's occupation level (13)	11.57
Father's occupation level (13)	36.94
Retrospective measure of childhood long-term illness (32)	59.65
Long-term illness (15)	16.7
Long-term illness (17)	28.32
Long-term illness (25)	53.39
Long-term illness (32)	56.16
Retrospective measure of childhood self-rated general health (32)	59.48
Self-rated general health (15)	22.64
Self-rated general health (16)	23.87
Self-rated general health (17)	28.97
Self-rated general health (25)	53.4
Self-rated general health (32)	56.08
Mental health (GHQ) (15)	21.18
Mental health (GHQ) (17)	31.98
Mental health (GHQ) (25)	54.34
Mental health (GHQ) (32)	57.42
Economic activity (25)	52.44
Economic activity (32)	55.32

## Sheet: supplimentary Table 2
		Long-term illness						Self-rated general health						Mental health
		Childhood		Adolescence		Early adulthood		Childhood		Adolescence		Early adulthood		Childhood		Adolescence		Early adulthood
		No long-term illness	Long-term illness	No long-term illness	Long-term illness	No long-term illness	Long-term illness	Good	Poor	Good	Poor	Good	Poor	Good	Poor	Good	Poor	Good	Poor
Gender, N (%)	Male	6889 (50.2)	1315 (54.9)	7714 (50.9)	490 (51.4)	7305 (52)	899 (43.4)	7753 (51.5)	451 (42.4)	7858 (51.6)	346 (38.3)	7725 (51.3)	479 (45.7)	7338 (54.3)	866 (33.2)	7084 (54.5)	1120 (35.8)	6924 (52.6)	1280 (43.1)
	Female	6836 (49.8)	1082 (45.1)	7455 (49.1)	463 (48.6)	6746 (48)	1172 (56.6)	7305 (48.5)	613 (57.6)	7360 (48.4)	558 (61.7)	7348 (48.7)	570 (54.3)	6173 (45.7)	1745 (66.8)	5907 (45.5)	2011 (64.2)	6227 (47.4)	1691 (56.9)
Ethnicity, N (%)	White	8733 (63.6)	1840 (76.8)	9855 (65)	718 (75.4)	9031 (64.3)	1542 (74.5)	9846 (65.4)	727 (68.3)	9961 (65.5)	612 (67.7)	9841 (65.3)	732 (69.8)	8866 (65.6)	1707 (65.4)	8579 (66)	1994 (63.7)	8589 (65.3)	1984 (66.8)
	Mixed	681 (5)	135 (5.6)	763 (5)	52 (5.5)	690 (4.9)	126 (6.1)	759 (5)	57 (5.3)	778 (5.1)	38 (4.2)	759 (5)	57 (5.4)	641 (4.7)	174 (6.7)	623 (4.8)	193 (6.1)	651 (4.9)	165 (5.6)
	Indian	937 (6.8)	83 (3.5)	988 (6.5)	32 (3.4)	925 (6.6)	95 (4.6)	952 (6.3)	68 (6.4)	971 (6.4)	49 (5.4)	979 (6.5)	41 (3.9)	880 (6.5)	140 (5.4)	824 (6.3)	196 (6.3)	861 (6.5)	159 (5.4)
	Pakistani/Bangladeshi	1568 (11.4)	141 (5.9)	1641 (10.8)	68 (7.1)	1581 (11.3)	128 (6.2)	1599 (10.6)	110 (10.4)	1612 (10.6)	96 (10.7)	1601 (10.6)	108 (10.3)	1446 (10.7)	263 (10.1)	1371 (10.6)	338 (10.8)	1410 (10.7)	299 (10.1)
	Black	1411 (10.3)	164 (6.8)	1511 (10)	64 (6.7)	1433 (10.2)	141 (6.8)	1497 (9.9)	78 (7.3)	1502 (9.9)	72 (8)	1490 (9.9)	85 (8.1)	1338 (9.9)	237 (9.1)	1274 (9.8)	301 (9.6)	1300 (9.9)	275 (9.3)
	Other	396 (2.9)	33 (1.4)	411 (2.7)	18 (1.9)	391 (2.8)	39 (1.9)	405 (2.7)	24 (2.3)	393 (2.6)	36 (4)	402 (2.7)	27 (2.6)	340 (2.5)	90 (3.4)	320 (2.5)	110 (3.5)	341 (2.6)	88 (3)
Having a degree (32), N (%)	Not having a degree	7712 (56.2)	1526 (63.7)	8639 (57)	598 (62.8)	8011 (57)	1227 (59.2)	8568 (56.9)	670 (63)	8701 (57.2)	537 (59.4)	8528 (56.6)	710 (67.6)	7850 (58.1)	1387 (53.1)	7648 (58.9)	1589 (50.8)	7524 (57.2)	1714 (57.7)
	Having a degree or above	6014 (43.8)	870 (36.3)	6530 (43)	354 (37.2)	6040 (43)	845 (40.8)	6490 (43.1)	394 (37)	6517 (42.8)	368 (40.6)	6545 (43.4)	340 (32.4)	5660 (41.9)	1224 (46.9)	5343 (41.1)	1542 (49.2)	5628 (42.8)	1256 (42.3)
Economic activity at 25, N (%)	Employed	11968 (87.2)	1898 (79.2)	13159 (86.7)	708 (74.3)	12365 (88)	1502 (72.5)	13075 (86.8)	792 (74.5)	13151 (86.4)	715 (79.1)	13201 (87.6)	665 (63.4)	11740 (86.9)	2127 (81.5)	11297 (87)	2570 (82.1)	11614 (88.3)	2253 (75.8)
	Unemployed	564 (4.1)	147 (6.1)	631 (4.2)	80 (8.4)	553 (3.9)	158 (7.6)	632 (4.2)	79 (7.4)	666 (4.4)	45 (5)	593 (3.9)	118 (11.2)	578 (4.3)	133 (5.1)	556 (4.3)	155 (4.9)	459 (3.5)	252 (8.5)
	Inactive	1193 (8.7)	351 (14.7)	1379 (9.1)	165 (17.3)	1133 (8.1)	412 (19.9)	1351 (9)	193 (18.1)	1400 (9.2)	144 (15.9)	1278 (8.5)	266 (25.3)	1193 (8.8)	352 (13.5)	1138 (8.8)	406 (13)	1079 (8.2)	465 (15.7)
Long-term illness (32), N (%)	Not having	11471 (83.6)	1466 (61.2)	12418 (81.9)	519 (54.5)	12177 (86.7)	760 (36.7)	12363 (82.1)	574 (53.9)	12348 (81.1)	589 (65.1)	12540 (83.2)	397 (37.9)	11123 (82.3)	1814 (69.5)	10725 (82.6)	2212 (70.6)	11013 (83.7)	1923 (64.8)
	Having	2255 (16.4)	931 (38.8)	2752 (18.1)	433 (45.5)	1874 (13.3)	1311 (63.3)	2695 (17.9)	491 (46.1)	2870 (18.9)	316 (34.9)	2533 (16.8)	652 (62.1)	2388 (17.7)	797 (30.5)	2266 (17.4)	919 (29.4)	2138 (16.3)	1047 (35.2)
Self-rated general health (32), N (%)	Good	12625 (92)	1935 (80.7)	13803 (91)	758 (79.6)	13105 (93.3)	1455 (70.3)	13836 (91.9)	725 (68.1)	13824 (90.8)	736 (81.4)	14035 (93.1)	526 (50.1)	12348 (91.4)	2213 (84.7)	11894 (91.6)	2667 (85.2)	12230 (93)	2331 (78.5)
	Poor	1100 (8)	461 (19.3)	1367 (9)	195 (20.4)	946 (6.7)	616 (29.7)	1222 (8.1)	339 (31.9)	1393 (9.2)	169 (18.6)	1038 (6.9)	523 (49.9)	1163 (8.6)	398 (15.3)	1097 (8.4)	464 (14.8)	922 (7)	639 (21.5)
Mental health (32), N (%)	Good	10833 (78.9)	1669 (69.6)	11837 (78)	665 (69.9)	11234 (80)	1268 (61.2)	11841 (78.6)	661 (62.2)	11923 (78.4)	579 (64)	11938 (79.2)	564 (53.7)	10792 (79.9)	1710 (65.5)	10477 (80.6)	2026 (64.7)	10811 (82.2)	1691 (56.9)
	Poor	2892 (21.1)	727 (30.4)	3333 (22)	287 (30.1)	2817 (20)	803 (38.8)	3217 (21.4)	403 (37.8)	3294 (21.6)	325 (36)	3134 (20.8)	485 (46.3)	2719 (20.1)	901 (34.5)	2514 (19.4)	1105 (35.3)	2341 (17.8)	1279 (43.1)
Mother's education (13), N (%)	Not having a degree	12445 (90.7)	2158 (90)	13754 (90.7)	849 (89.1)	12755 (90.8)	1848 (89.2)	13625 (90.5)	978 (91.9)	13807 (90.7)	796 (88)	13648 (90.5)	955 (91)	12298 (91)	2305 (88.3)	11875 (91.4)	2727 (87.1)	11925 (90.7)	2677 (90.1)
	Having a degree or above	1281 (9.3)	239 (10)	1416 (9.3)	103 (10.9)	1296 (9.2)	223 (10.8)	1433 (9.5)	86 (8.1)	1411 (9.3)	109 (12)	1425 (9.5)	94 (9)	1213 (9)	306 (11.7)	1116 (8.6)	404 (12.9)	1226 (9.3)	293 (9.9)
Father's education (13), N (%)	Not having a degree	12115 (88.3)	2125 (88.7)	13411 (88.4)	829 (87.1)	12431 (88.5)	1809 (87.3)	13274 (88.2)	966 (90.8)	13447 (88.4)	793 (87.7)	13284 (88.1)	956 (91.2)	12007 (88.9)	2233 (85.5)	11576 (89.1)	2664 (85.1)	11626 (88.4)	2614 (88)
	Having a degree or above	1610 (11.7)	272 (11.3)	1759 (11.6)	123 (12.9)	1619 (11.5)	262 (12.7)	1784 (11.8)	98 (9.2)	1771 (11.6)	111 (12.3)	1789 (11.9)	93 (8.8)	1504 (11.1)	378 (14.5)	1415 (10.9)	467 (14.9)	1526 (11.6)	356 (12)
Mother's occupation level (13), N (%)	Not working	2209 (16.1)	252 (10.5)	2353 (15.5)	108 (11.3)	2233 (15.9)	228 (11)	2309 (15.3)	152 (14.3)	2319 (15.2)	142 (15.7)	2297 (15.2)	164 (15.6)	2086 (15.4)	374 (14.3)	1989 (15.3)	472 (15.1)	2032 (15.4)	429 (14.4)
	Routine/semi-routine	4264 (31.1)	819 (34.2)	4742 (31.3)	340 (35.7)	4407 (31.4)	676 (32.6)	4704 (31.2)	379 (35.6)	4824 (31.7)	259 (28.7)	4723 (31.3)	360 (34.3)	4302 (31.8)	781 (29.9)	4198 (32.3)	885 (28.3)	4140 (31.5)	943 (31.7)
	Middle	3655 (26.6)	666 (27.8)	4073 (26.8)	248 (26)	3779 (26.9)	542 (26.1)	4041 (26.8)	280 (26.3)	4067 (26.7)	254 (28)	4059 (26.9)	261 (24.9)	3594 (26.6)	726 (27.8)	3465 (26.7)	856 (27.3)	3519 (26.8)	801 (27)
	High	3599 (26.2)	659 (27.5)	4001 (26.4)	257 (26.9)	3632 (25.8)	626 (30.2)	4004 (26.6)	253 (23.8)	4008 (26.3)	250 (27.6)	3993 (26.5)	264 (25.2)	3529 (26.1)	729 (27.9)	3340 (25.7)	918 (29.3)	3460 (26.3)	797 (26.8)
Father's occupation level (13), N (%)	Not working	724 (5.3)	104 (4.4)	783 (5.2)	46 (4.8)	741 (5.3)	88 (4.2)	769 (5.1)	60 (5.6)	787 (5.2)	42 (4.7)	774 (5.1)	56 (5.3)	705 (5.2)	124 (4.7)	683 (5.3)	146 (4.7)	678 (5.2)	151 (5.1)
	Routine/semi-routine	3257 (23.7)	618 (25.8)	3633 (24)	241 (25.3)	3352 (23.9)	522 (25.2)	3587 (23.8)	287 (27)	3663 (24.1)	211 (23.3)	3552 (23.6)	322 (30.7)	3262 (24.1)	612 (23.4)	3187 (24.5)	688 (22)	3105 (23.6)	770 (25.9)
	Middle	5108 (37.2)	856 (35.7)	5618 (37)	345 (36.3)	5257 (37.4)	706 (34.1)	5573 (37)	391 (36.7)	5625 (37)	339 (37.4)	5607 (37.2)	357 (34)	5057 (37.4)	907 (34.7)	4882 (37.6)	1082 (34.6)	4926 (37.5)	1038 (34.9)
	High	4636 (33.8)	819 (34.2)	5135 (33.8)	321 (33.7)	4700 (33.5)	755 (36.5)	5129 (34.1)	326 (30.6)	5143 (33.8)	313 (34.6)	5140 (34.1)	315 (30)	4487 (33.2)	968 (37.1)	4240 (32.6)	1215 (38.8)	4443 (33.8)	1012 (34.1)
Total n, N (%)		13725 (85.1)	2397 (14.9)	15170 (94.1)	952 (5.9)	14051 (87.2)	2071 (12.8)	15058 (93.4)	1064 (6.6)	15217 (94.4)	904 (5.6)	15073 (93.5)	1048 (6.5)	13511 (83.8)	2611 (16.2)	12991 (80.6)	3131 (19.4)	13141(81.5)	2970 (18.4)

## Sheet: supplimentary Table 3a
Independent variable:	Long-term illness																		Self-rated general health																		Mental health
	Childhood only		Childhood only adjusted		Adolescence only		Adolescence only adjusted		Early adulthood only		Early adulthood only adjusted		Childhood + Adolescence adjusted		Three stage adjusted		Adjusted (sensitivity test)		Childhood only		Childhood only adjusted		Adolescence only		Adolescence only adjusted		Early adulthood only		Early adulthood only adjusted		Childhood + Adolescence adjusted		Three stage adjusted		Adjusted (sensitivity test)		Childhood only		Childhood only adjusted		Adolescence only		Adolescence only adjusted		Early adulthood only		Early adulthood only adjusted		Childhood + Adolescence adjusted
Activity (ref: employment)	Unemployment	Inactivity	Unemployment	Inactivity	Unemployment	Inactivity	Unemployment	Inactivity	Unemployment	Inactivity	Unemployment	Inactivity	Unemployment	Inactivity	Unemployment	Inactivity	Unemployment	Inactivity	Unemployment	Inactivity	Unemployment	Inactivity	Unemployment	Inactivity	Unemployment	Inactivity	Unemployment	Inactivity	Unemployment	Inactivity	Unemployment	Inactivity	Unemployment	Inactivity	Unemployment	Inactivity	Unemployment	Inactivity	Unemployment	Inactivity	Unemployment	Inactivity	Unemployment	Inactivity	Unemployment	Inactivity	Unemployment	Inactivity	Unemployment
(Intercept)	0.03** [0.02, 0.03]	0.07** [0.07, 0.08]	0.05** [0.03, 0.08]	0.08** [0.05, 0.11]	0.03** [0.02, 0.03]	0.08** [0.07, 0.08]	0.05** [0.03, 0.09]	0.09** [0.06, 0.13]	0.02** [0.02, 0.03]	0.07** [0.06, 0.07]	0.04** [0.03, 0.08]	0.08** [0.05, 0.11]	0.05** [0.03, 0.08]	0.07** [0.05, 0.11]	0.04** [0.02, 0.07]	0.07** [0.05, 0.10]	0.03** [0.01, 0.05]	0.05** [0.03, 0.07]	0.03** [0.02, 0.03]	0.08** [0.07, 0.08]	0.05** [0.03, 0.08]	0.09** [0.06, 0.13]	0.03** [0.03, 0.03]	0.08** [0.07, 0.09]	0.05** [0.03, 0.09]	0.09** [0.06, 0.13]	0.03** [0.02, 0.03]	0.07** [0.06, 0.08]	0.04** [0.03, 0.08]	0.08** [0.05, 0.12]	0.05** [0.03, 0.08]	0.08** [0.06, 0.13]	0.04** [0.02, 0.08]	0.07** [0.05, 0.11]	0.03** [0.02, 0.05]	0.05** [0.03, 0.08]	0.03** [0.02, 0.03]	0.08** [0.07, 0.08]	0.05** [0.03, 0.09]	0.09** [0.06, 0.13]	0.03** [0.02, 0.03]	0.08** [0.07, 0.08]	0.05** [0.03, 0.09]	0.09** [0.06, 0.13]	0.02** [0.02, 0.03]	0.07** [0.06, 0.08]	0.04** [0.02, 0.08]	0.08** [0.06, 0.12]	0.05** [0.03, 0.08]
Childhood	1.64** [1.22, 2.20]	2.14** [1.82, 2.51]	1.75** [1.29, 2.35]	2.39** [2.01, 2.83]									1.64** [1.20, 2.25]	2.08** [1.72, 2.51]	1.39 [1.00, 1.94]	1.70** [1.40, 2.06]	1.15 [0.81, 1.64]	1.39** [1.12, 1.71]	2.38** [1.71, 3.33]	2.90** [2.37, 3.55]	2.32** [1.65, 3.25]	2.71** [2.19, 3.35]									2.33** [1.66, 3.29]	2.56** [2.06, 3.18]	1.84** [1.28, 2.63]	1.94** [1.54, 2.44]	1.29 [0.87, 1.91]	1.44** [1.12, 1.87]	1.48** [1.11, 1.95]	1.54** [1.29, 1.84]	1.45* [1.09, 1.94]	1.34** [1.12, 1.61]									1.37* [1.01, 1.85]
Adolescence					1.63* [1.04, 2.54]	2.42** [1.95, 3.02]	1.68* [1.07, 2.63]	2.52** [2.00, 3.17]					1.33 [0.83, 2.15]	1.78** [1.38, 2.29]	1.08 [0.67, 1.76]	1.41** [1.09, 1.82]	0.83 [0.50, 1.37]	1.20 [0.91, 1.58]					1.11 [0.68, 1.84]	1.89** [1.49, 2.41]	1.10 [0.66, 1.82]	1.74** [1.36, 2.22]					0.94 [0.56, 1.57]	1.44** [1.11, 1.85]	0.83 [0.50, 1.39]	1.25 [0.96, 1.64]	0.83 [0.49, 1.42]	1.14 [0.85, 1.53]					1.33* [1.01, 1.74]	1.48** [1.24, 1.76]	1.34* [1.01, 1.77]	1.34** [1.12, 1.60]					1.23 [0.92, 1.65]
Early Adulthood									2.52** [1.86, 3.41]	3.24** [2.72, 3.87]	2.68** [1.97, 3.66]	3.35** [2.77, 4.05]			2.45** [1.77, 3.40]	2.78** [2.28, 3.38]	1.20 [0.82, 1.76]	1.43** [1.13, 1.81]									3.97** [2.90, 5.43]	4.95** [4.03, 6.09]	3.91** [2.84, 5.36]	4.84** [3.90, 6.02]			3.55** [2.55, 4.93]	4.19** [3.35, 5.24]	1.51* [1.01, 2.26]	2.00** [1.51, 2.66]									2.50** [1.93, 3.24]	2.07** [1.75, 2.45]	2.49** [1.92, 3.24]	1.95** [1.65, 2.31]
Gender (ref: male): female			1.35** [1.07, 1.69]	2.72** [2.28, 3.24]			1.32* [1.06, 1.66]	2.64** [2.22, 3.14]			1.28* [1.02, 1.61]	2.52** [2.12, 3.01]	1.35* [1.07, 1.69]	2.72** [2.28, 3.24]	1.30* [1.03, 1.63]	2.60** [2.18, 3.10]	1.27* [1.00, 1.60]	2.20** [1.82, 2.67]			1.30* [1.03, 1.63]	2.56** [2.15, 3.05]			1.32* [1.05, 1.66]	2.58** [2.17, 3.07]			1.31* [1.05, 1.65]	2.61** [2.19, 3.11]	1.30* [1.03, 1.63]	2.53** [2.13, 3.01]	1.30* [1.04, 1.64]	2.55** [2.13, 3.04]	1.33* [1.05, 1.68]	2.25** [1.86, 2.72]			1.26* [1.00, 1.59]	2.54** [2.13, 3.02]			1.28* [1.01, 1.61]	2.54** [2.13, 3.02]			1.25 [0.99, 1.58]	2.53** [2.13, 3.01]	1.24 [0.98, 1.57]
Ethnicity (ref: White): Mixed			1.38 [0.85, 2.23]	0.92 [0.63, 1.33]			1.37 [0.85, 2.22]	0.92 [0.63, 1.33]			1.36 [0.84, 2.21]	0.90 [0.62, 1.32]	1.38 [0.85, 2.24]	0.92 [0.63, 1.34]	1.37 [0.84, 2.22]	0.91 [0.63, 1.33]	1.32 [0.79, 2.22]	0.94 [0.63, 1.41]			1.38 [0.85, 2.23]	0.92 [0.63, 1.33]			1.37 [0.85, 2.22]	0.92 [0.63, 1.33]			1.38 [0.85, 2.23]	0.91 [0.63, 1.33]	1.37 [0.85, 2.23]	0.92 [0.64, 1.34]	1.38 [0.85, 2.23]	0.92 [0.63, 1.34]	1.31 [0.78, 2.21]	0.93 [0.62, 1.39]			1.34 [0.83, 2.18]	0.90 [0.62, 1.30]			1.35 [0.84, 2.19]	0.90 [0.62, 1.31]			1.36 [0.84, 2.20]	0.91 [0.63, 1.31]	1.34 [0.83, 2.17]
Ethnicity: Indian			0.70 [0.40, 1.23]	0.59** [0.41, 0.86]			0.68 [0.39, 1.19]	0.56** [0.39, 0.82]			0.70 [0.40, 1.24]	0.58** [0.40, 0.85]	0.71 [0.40, 1.24]	0.60** [0.42, 0.88]	0.73 [0.42, 1.28]	0.63* [0.43, 0.91]	1.00 [0.55, 1.80]	0.98 [0.66, 1.46]			0.66 [0.38, 1.16]	0.54** [0.37, 0.78]			0.66 [0.38, 1.16]	0.54** [0.37, 0.78]			0.70 [0.40, 1.23]	0.58** [0.40, 0.84]	0.66 [0.38, 1.16]	0.54** [0.37, 0.79]	0.70 [0.40, 1.23]	0.58** [0.40, 0.85]	0.89 [0.50, 1.61]	0.87 [0.58, 1.29]			0.67 [0.38, 1.17]	0.54** [0.37, 0.78]			0.66 [0.38, 1.16]	0.53** [0.37, 0.77]			0.69 [0.39, 1.20]	0.55** [0.38, 0.80]	0.67 [0.38, 1.17]
Ethnicity: Pakistani/Bangladeshi			1.12 [0.70, 1.79]	1.24 [0.93, 1.65]			1.08 [0.68, 1.72]	1.17 [0.87, 1.56]			1.16 [0.73, 1.85]	1.28 [0.95, 1.72]	1.12 [0.71, 1.79]	1.25 [0.93, 1.67]	1.19 [0.75, 1.91]	1.34 [1.00, 1.81]	1.38 [0.84, 2.27]	1.61** [1.17, 2.23]			1.07 [0.67, 1.70]	1.15 [0.86, 1.52]			1.06 [0.67, 1.69]	1.13 [0.85, 1.51]			1.10 [0.69, 1.76]	1.19 [0.88, 1.59]	1.07 [0.67, 1.70]	1.15 [0.86, 1.53]	1.10 [0.69, 1.76]	1.20 [0.89, 1.61]	1.20 [0.73, 1.98]	1.39* [1.01, 1.92]			1.06 [0.67, 1.69]	1.13 [0.85, 1.50]			1.06 [0.66, 1.68]	1.13 [0.85, 1.50]			1.08 [0.67, 1.72]	1.14 [0.85, 1.52]	1.06 [0.66, 1.68]
Ethnicity: Black			1.00 [0.65, 1.56]	0.89 [0.68, 1.18]			0.97 [0.63, 1.52]	0.86 [0.65, 1.14]			1.03 [0.66, 1.61]	0.91 [0.68, 1.21]	1.01 [0.65, 1.57]	0.91 [0.69, 1.20]	1.06 [0.68, 1.65]	0.96 [0.72, 1.28]	1.16 [0.73, 1.84]	1.14 [0.83, 1.57]			0.98 [0.63, 1.52]	0.85 [0.64, 1.13]			0.96 [0.62, 1.49]	0.83 [0.63, 1.10]			1.00 [0.64, 1.55]	0.87 [0.65, 1.15]	0.98 [0.63, 1.52]	0.86 [0.65, 1.13]	1.01 [0.65, 1.57]	0.89 [0.67, 1.18]	1.06 [0.67, 1.67]	1.02 [0.75, 1.40]			0.96 [0.62, 1.49]	0.83 [0.63, 1.10]			0.96 [0.62, 1.49]	0.82 [0.62, 1.09]			0.97 [0.63, 1.52]	0.83 [0.63, 1.10]	0.96 [0.62, 1.49]
Ethnicity: Other			1.17 [0.58, 2.33]	1.09 [0.69, 1.70]			1.11 [0.56, 2.22]	1.02 [0.65, 1.60]			1.18 [0.59, 2.35]	1.08 [0.68, 1.69]	1.17 [0.59, 2.34]	1.10 [0.70, 1.72]	1.22 [0.61, 2.44]	1.15 [0.73, 1.81]	1.41 [0.68, 2.95]	1.34 [0.83, 2.17]			1.12 [0.56, 2.22]	1.02 [0.65, 1.60]			1.10 [0.55, 2.18]	0.96 [0.61, 1.51]			1.13 [0.56, 2.26]	1.04 [0.66, 1.63]	1.12 [0.56, 2.23]	1.01 [0.64, 1.58]	1.14 [0.57, 2.29]	1.05 [0.67, 1.65]	1.24 [0.60, 2.58]	1.15 [0.71, 1.85]			1.08 [0.54, 2.15]	0.97 [0.62, 1.51]			1.07 [0.54, 2.14]	0.96 [0.61, 1.50]			1.08 [0.54, 2.17]	0.97 [0.62, 1.52]	1.06 [0.53, 2.12]
Education (ref: not having a degree): Having a degree																	0.47** [0.34, 0.64]	0.46** [0.37, 0.56]																	0.49** [0.36, 0.68]	0.48** [0.39, 0.59]
Economic activity (25) (ref: employed): Unemployed																	11.51** [7.82, 16.96]	1.73** [1.18, 2.54]																	11.21** [7.66, 16.39]	1.69** [1.16, 2.47]
Economic activity (25): Inactive																	1.80* [1.12, 2.87]	6.31** [4.90, 8.13]																	1.83* [1.13, 2.97]	6.44** [4.98, 8.32]
Long-term illness (32) (ref: no long-term illness): long-term illness																	3.11** [2.36, 4.11]	2.57** [2.13, 3.11]																	3.17** [2.31, 4.36]	2.65** [2.13, 3.29]
Mother's education (13) (ref: not having a degree): Having a degree			1.14 [0.67, 1.94]	0.88 [0.63, 1.22]			1.14 [0.67, 1.93]	0.87 [0.63, 1.21]			1.13 [0.66, 1.92]	0.88 [0.64, 1.22]	1.13 [0.66, 1.93]	0.87 [0.63, 1.21]	1.12 [0.66, 1.91]	0.87 [0.63, 1.21]	1.25 [0.72, 2.17]	1.02 [0.73, 1.44]			1.14 [0.67, 1.95]	0.88 [0.64, 1.22]			1.14 [0.67, 1.94]	0.88 [0.63, 1.21]			1.12 [0.66, 1.91]	0.87 [0.63, 1.21]	1.15 [0.67, 1.95]	0.88 [0.63, 1.22]	1.12 [0.66, 1.91]	0.86 [0.62, 1.19]	1.29 [0.74, 2.27]	1.03 [0.73, 1.46]			1.13 [0.66, 1.92]	0.88 [0.64, 1.22]			1.12 [0.66, 1.91]	0.87 [0.63, 1.20]			1.13 [0.67, 1.93]	0.88 [0.64, 1.22]	1.12 [0.66, 1.90]
Father's education (13) (ref: not having a degree): Having a degree			0.68 [0.37, 1.26]	1.03 [0.75, 1.42]			0.68 [0.37, 1.25]	1.02 [0.74, 1.40]			0.68 [0.37, 1.25]	1.03 [0.75, 1.43]	0.68 [0.37, 1.26]	1.03 [0.75, 1.41]	0.68 [0.37, 1.26]	1.03 [0.75, 1.43]	0.82 [0.43, 1.55]	1.15 [0.81, 1.64]			0.69 [0.37, 1.27]	1.04 [0.76, 1.43]			0.68 [0.37, 1.25]	1.03 [0.75, 1.41]			0.70 [0.38, 1.29]	1.06 [0.77, 1.47]	0.69 [0.37, 1.27]	1.04 [0.76, 1.43]	0.71 [0.38, 1.30]	1.07 [0.78, 1.49]	0.82 [0.43, 1.56]	1.17 [0.83, 1.67]			0.67 [0.36, 1.24]	1.02 [0.74, 1.39]			0.67 [0.37, 1.24]	1.02 [0.75, 1.40]			0.67 [0.37, 1.24]	1.02 [0.74, 1.40]	0.67 [0.36, 1.23]
Mother's occupation level (13) (ref: not working): routine/semi-routine			0.74 [0.50, 1.08]	0.79 [0.61, 1.02]			0.74 [0.50, 1.09]	0.79 [0.62, 1.02]			0.74 [0.50, 1.09]	0.79 [0.61, 1.02]	0.74 [0.50, 1.08]	0.78 [0.61, 1.01]	0.73 [0.50, 1.08]	0.78 [0.60, 1.01]	0.74 [0.49, 1.12]	0.79 [0.60, 1.04]			0.73 [0.50, 1.08]	0.79 [0.61, 1.01]			0.74 [0.51, 1.09]	0.81 [0.63, 1.04]			0.74 [0.50, 1.10]	0.80 [0.62, 1.03]	0.73 [0.50, 1.08]	0.79 [0.62, 1.02]	0.73 [0.50, 1.09]	0.79 [0.61, 1.02]	0.77 [0.51, 1.16]	0.81 [0.61, 1.08]			0.74 [0.51, 1.09]	0.80 [0.63, 1.03]			0.75 [0.51, 1.10]	0.81 [0.63, 1.04]			0.74 [0.50, 1.09]	0.80 [0.62, 1.02]	0.74 [0.51, 1.09]
Mother's occupation level (13): middle level			0.58* [0.37, 0.89]	0.55** [0.42, 0.73]			0.58* [0.38, 0.90]	0.56** [0.43, 0.74]			0.58* [0.37, 0.89]	0.56** [0.42, 0.74]	0.58* [0.37, 0.89]	0.55** [0.42, 0.73]	0.58* [0.37, 0.89]	0.55** [0.42, 0.73]	0.69 [0.44, 1.09]	0.63** [0.46, 0.85]			0.58* [0.37, 0.89]	0.56** [0.43, 0.74]			0.58* [0.38, 0.90]	0.57** [0.43, 0.74]			0.59* [0.38, 0.91]	0.57** [0.43, 0.75]	0.58* [0.37, 0.89]	0.56** [0.43, 0.74]	0.58* [0.37, 0.90]	0.56** [0.43, 0.75]	0.70 [0.44, 1.12]	0.65** [0.48, 0.88]			0.58* [0.38, 0.89]	0.56** [0.43, 0.74]			0.58* [0.38, 0.90]	0.56** [0.43, 0.74]			0.57* [0.37, 0.88]	0.56** [0.42, 0.73]	0.58* [0.38, 0.89]
Mother's occupation level (13): high			0.44** [0.27, 0.73]	0.50** [0.37, 0.68]			0.45** [0.27, 0.74]	0.50** [0.37, 0.69]			0.43** [0.26, 0.72]	0.48** [0.35, 0.66]	0.44** [0.27, 0.73]	0.50** [0.36, 0.68]	0.43** [0.26, 0.72]	0.48** [0.35, 0.65]	0.51* [0.30, 0.87]	0.55** [0.39, 0.76]			0.44** [0.27, 0.74]	0.50** [0.37, 0.68]			0.45** [0.27, 0.74]	0.51** [0.37, 0.69]			0.45** [0.27, 0.74]	0.50** [0.37, 0.68]	0.44** [0.27, 0.74]	0.50** [0.37, 0.69]	0.44** [0.27, 0.73]	0.50** [0.37, 0.68]	0.52* [0.30, 0.89]	0.57** [0.41, 0.80]			0.45** [0.27, 0.74]	0.50** [0.37, 0.68]			0.45** [0.27, 0.74]	0.51** [0.37, 0.69]			0.44** [0.27, 0.73]	0.50** [0.37, 0.68]	0.45** [0.27, 0.74]
Father's occupation level (13) (ref: not working): routine/semi-routine			0.93 [0.55, 1.58]	0.96 [0.69, 1.35]			0.94 [0.55, 1.58]	0.97 [0.69, 1.36]			0.92 [0.55, 1.55]	0.95 [0.68, 1.33]	0.93 [0.55, 1.58]	0.96 [0.69, 1.35]	0.92 [0.54, 1.55]	0.95 [0.68, 1.33]	0.83 [0.47, 1.44]	0.96 [0.67, 1.39]			0.94 [0.56, 1.59]	0.98 [0.70, 1.36]			0.94 [0.55, 1.59]	0.97 [0.70, 1.36]			0.91 [0.54, 1.55]	0.94 [0.67, 1.32]	0.94 [0.56, 1.59]	0.97 [0.70, 1.36]	0.91 [0.54, 1.56]	0.94 [0.67, 1.32]	0.83 [0.47, 1.46]	0.96 [0.66, 1.38]			0.93 [0.55, 1.58]	0.97 [0.70, 1.36]			0.94 [0.55, 1.58]	0.97 [0.70, 1.36]			0.92 [0.54, 1.56]	0.96 [0.69, 1.35]	0.93 [0.55, 1.58]
Father's occupation level (13): middle level			0.76 [0.45, 1.28]	0.76 [0.54, 1.06]			0.76 [0.45, 1.28]	0.75 [0.54, 1.05]			0.76 [0.45, 1.28]	0.75 [0.54, 1.05]	0.76 [0.45, 1.29]	0.76 [0.54, 1.06]	0.76 [0.45, 1.28]	0.76 [0.54, 1.06]	0.76 [0.43, 1.32]	0.82 [0.57, 1.19]			0.77 [0.46, 1.29]	0.76 [0.54, 1.06]			0.76 [0.45, 1.28]	0.75 [0.54, 1.05]			0.77 [0.45, 1.29]	0.76 [0.55, 1.07]	0.77 [0.46, 1.29]	0.75 [0.54, 1.06]	0.77 [0.46, 1.30]	0.76 [0.54, 1.07]	0.75 [0.43, 1.31]	0.82 [0.57, 1.18]			0.76 [0.45, 1.28]	0.75 [0.54, 1.05]			0.76 [0.45, 1.27]	0.75 [0.54, 1.04]			0.77 [0.45, 1.29]	0.76 [0.54, 1.06]	0.76 [0.45, 1.27]
Father's occupation level (13): high			0.55* [0.32, 0.95]	0.58** [0.39, 0.85]			0.55* [0.32, 0.95]	0.58** [0.39, 0.85]			0.54* [0.31, 0.93]	0.56** [0.38, 0.83]	0.55* [0.32, 0.95]	0.58** [0.39, 0.85]	0.54* [0.31, 0.94]	0.56** [0.38, 0.83]	0.64 [0.36, 1.16]	0.73 [0.47, 1.11]			0.55* [0.32, 0.96]	0.58** [0.39, 0.85]			0.55* [0.32, 0.95]	0.57** [0.39, 0.84]			0.55* [0.32, 0.96]	0.58** [0.39, 0.85]	0.55* [0.32, 0.96]	0.58** [0.39, 0.85]	0.56* [0.32, 0.97]	0.58** [0.39, 0.86]	0.65 [0.36, 1.18]	0.75 [0.49, 1.14]			0.55* [0.31, 0.95]	0.57** [0.39, 0.84]			0.54* [0.31, 0.94]	0.57** [0.39, 0.83]			0.55* [0.32, 0.95]	0.57** [0.39, 0.85]	0.54* [0.31, 0.94]
LogLikelihood		-308112		-294125		-309102		-294125		-303614		-290204		-288365		-288365		-254463		-307463		-294601		-310204		-297053		-301533		-288819		-294321		-287257		-255334		-309997		-297098		-310151		-297128		-306804		-293983
McFadden_R2		0.00942854		0.0543977		0.00624443		0.0543977		0.0238904		0.0670017		0.072916		0.072916		0.181909		0.0115154		0.0528657		0.00270241		0.0449821		0.0305806		0.0714547		0.053766		0.0764756		0.179109		0.00336933		0.0448384		0.00287357		0.0447406		0.0136347		0.0548542
[truncated: 5 more columns]

## Sheet: supplimentary Table 3b
Female only
Independent variable:	Long-term illness																		Self-rated general health																		Mental health
	Childhood only		Childhood only adjusted		Adolescence only		Adolescence only adjusted		Early adulthood only		Early adulthood only adjusted		Childhood + Adolescence adjusted		Three stage adjusted		Adjusted (sensitivity test)		Childhood only		Childhood only adjusted		Adolescence only		Adolescence only adjusted		Early adulthood only		Early adulthood only adjusted		Childhood + Adolescence adjusted		Three stage adjusted		Adjusted (sensitivity test)		Childhood only		Childhood only adjusted		Adolescence only		Adolescence only adjusted		Early adulthood only		Early adulthood only adjusted		Childhood + Adolescence adjusted
Activity (ref: employment)	Unemployment	Inactivity	Unemployment	Inactivity	Unemployment	Inactivity	Unemployment	Inactivity	Unemployment	Inactivity	Unemployment	Inactivity	Unemployment	Inactivity	Unemployment	Inactivity	Unemployment	Inactivity	Unemployment	Inactivity	Unemployment	Inactivity	Unemployment	Inactivity	Unemployment	Inactivity	Unemployment	Inactivity	Unemployment	Inactivity	Unemployment	Inactivity	Unemployment	Inactivity	Unemployment	Inactivity	Unemployment	Inactivity	Unemployment	Inactivity	Unemployment	Inactivity	Unemployment	Inactivity	Unemployment	Inactivity	Unemployment	Inactivity	Unemployment
(Intercept)	0.03** [0.03, 0.03]	0.11** [0.11, 0.11]	0.09** [0.08, 0.10]	0.22** [0.21, 0.23]	0.03** [0.03, 0.03]	0.12** [0.12, 0.12]	0.09** [0.09, 0.10]	0.24** [0.23, 0.25]	0.03** [0.03, 0.03]	0.11** [0.11, 0.11]	0.08** [0.08, 0.09]	0.21** [0.20, 0.22]	0.09** [0.08, 0.09]	0.22** [0.21, 0.23]	0.08** [0.07, 0.09]	0.20** [0.19, 0.21]	0.05** [0.04, 0.05]	0.12** [0.11, 0.12]	0.03** [0.03, 0.03]	0.11** [0.11, 0.12]	0.09** [0.08, 0.10]	0.23** [0.22, 0.24]	0.03** [0.03, 0.03]	0.12** [0.12, 0.12]	0.09** [0.09, 0.10]	0.24** [0.23, 0.25]	0.03** [0.03, 0.03]	0.11** [0.11, 0.11]	0.08** [0.08, 0.09]	0.22** [0.21, 0.23]	0.09** [0.08, 0.10]	0.23** [0.22, 0.24]	0.08** [0.07, 0.09]	0.20** [0.19, 0.21]	0.06** [0.05, 0.06]	0.13** [0.12, 0.13]	0.03** [0.03, 0.03]	0.12** [0.12, 0.12]	0.09** [0.08, 0.10]	0.24** [0.23, 0.25]	0.03** [0.03, 0.03]	0.12** [0.12, 0.12]	0.09** [0.08, 0.10]	0.24** [0.23, 0.25]	0.03** [0.03, 0.03]	0.11** [0.11, 0.11]	0.08** [0.07, 0.08]	0.22** [0.21, 0.24]	0.09** [0.08, 0.10]
Childhood	1.47** [1.40, 1.55]	1.94** [1.89, 1.99]	1.61** [1.53, 1.70]	2.09** [2.04, 2.15]									1.51** [1.43, 1.59]	1.89** [1.84, 1.95]	1.31** [1.24, 1.38]	1.60** [1.55, 1.64]	1.13** [1.07, 1.20]	1.32** [1.28, 1.36]	2.07** [1.96, 2.19]	2.29** [2.22, 2.36]	2.10** [1.99, 2.22]	2.28** [2.21, 2.35]									2.13** [2.01, 2.25]	2.16** [2.09, 2.23]	1.71** [1.61, 1.82]	1.72** [1.66, 1.78]	1.29** [1.21, 1.37]	1.34** [1.30, 1.39]	1.19** [1.14, 1.25]	1.17** [1.14, 1.19]	1.26** [1.21, 1.32]	1.22** [1.19, 1.25]									1.21** [1.15, 1.26]
Adolescence					1.55** [1.45, 1.66]	2.03** [1.96, 2.10]	1.62** [1.51, 1.74]	2.07** [1.99, 2.14]					1.35** [1.25, 1.45]	1.53** [1.48, 1.59]	1.16** [1.07, 1.25]	1.28** [1.23, 1.34]	0.98 [0.91, 1.07]	1.12** [1.08, 1.17]					1.05 [0.98, 1.13]	1.54** [1.49, 1.59]	1.07 [0.99, 1.15]	1.58** [1.53, 1.64]					0.92* [0.85, 0.99]	1.33** [1.29, 1.38]	0.84** [0.77, 0.90]	1.21** [1.16, 1.25]	0.90** [0.83, 0.97]	1.13** [1.09, 1.18]					1.14** [1.10, 1.19]	1.14** [1.12, 1.17]	1.21** [1.16, 1.26]	1.22** [1.19, 1.25]					1.15** [1.10, 1.20]
Early Adulthood									1.84** [1.76, 1.93]	2.25** [2.20, 2.30]	2.11** [2.01, 2.21]	2.52** [2.45, 2.58]			1.93** [1.84, 2.03]	2.15** [2.09, 2.21]	0.89** [0.84, 0.94]	1.27** [1.23, 1.31]									3.42** [3.25, 3.60]	3.78** [3.67, 3.89]	3.46** [3.29, 3.65]	3.80** [3.69, 3.91]			3.17** [3.00, 3.34]	3.35** [3.25, 3.45]	1.56** [1.46, 1.65]	1.72** [1.66, 1.78]									2.31** [2.22, 2.40]	1.68** [1.64, 1.72]	2.40** [2.31, 2.50]	1.72** [1.68, 1.76]
Ethnicity (ref: White): Mixed			1.56** [1.45, 1.68]	0.99 [0.95, 1.04]			1.57** [1.46, 1.69]	1.01 [0.96, 1.06]			1.55** [1.44, 1.67]	0.99 [0.94, 1.04]	1.56** [1.45, 1.68]	1.00 [0.95, 1.05]	1.55** [1.44, 1.67]	0.99 [0.95, 1.04]	1.64** [1.51, 1.77]	1.02 [0.97, 1.07]			1.58** [1.47, 1.70]	1.01 [0.96, 1.06]			1.57** [1.46, 1.69]	1.01 [0.96, 1.06]			1.55** [1.43, 1.66]	0.99 [0.95, 1.04]	1.58** [1.46, 1.70]	1.02 [0.97, 1.06]	1.55** [1.44, 1.67]	1.01 [0.96, 1.06]	1.57** [1.45, 1.69]	1.01 [0.96, 1.06]			1.55** [1.44, 1.67]	0.99 [0.94, 1.04]			1.56** [1.45, 1.68]	0.99 [0.95, 1.04]			1.56** [1.45, 1.68]	1.00 [0.95, 1.05]	1.55** [1.44, 1.66]
Ethnicity: Indian			0.84** [0.77, 0.91]	0.65** [0.62, 0.69]			0.82** [0.75, 0.90]	0.63** [0.60, 0.66]			0.85** [0.78, 0.92]	0.65** [0.62, 0.68]	0.85** [0.78, 0.92]	0.67** [0.63, 0.70]	0.87** [0.80, 0.95]	0.69** [0.65, 0.72]	1.31** [1.20, 1.44]	1.12** [1.06, 1.18]			0.82** [0.75, 0.89]	0.62** [0.59, 0.65]			0.80** [0.74, 0.87]	0.61** [0.58, 0.64]			0.85** [0.78, 0.92]	0.64** [0.61, 0.68]	0.82** [0.75, 0.89]	0.62** [0.59, 0.65]	0.85** [0.78, 0.93]	0.66** [0.62, 0.69]	1.14** [1.04, 1.24]	1.04 [0.98, 1.09]			0.81** [0.74, 0.88]	0.61** [0.58, 0.64]			0.80** [0.73, 0.87]	0.60** [0.57, 0.63]			0.82** [0.76, 0.90]	0.61** [0.58, 0.64]	0.81** [0.74, 0.88]
Ethnicity: Pakistani/Bangladeshi			1.15** [1.08, 1.23]	1.36** [1.31, 1.41]			1.12** [1.05, 1.19]	1.29** [1.24, 1.34]			1.18** [1.11, 1.26]	1.39** [1.34, 1.44]	1.15** [1.08, 1.23]	1.36** [1.31, 1.41]	1.20** [1.13, 1.29]	1.44** [1.38, 1.49]	1.47** [1.37, 1.58]	1.72** [1.65, 1.79]			1.13** [1.06, 1.21]	1.30** [1.25, 1.34]			1.11** [1.04, 1.18]	1.27** [1.23, 1.32]			1.15** [1.07, 1.22]	1.32** [1.27, 1.37]	1.13** [1.06, 1.21]	1.30** [1.25, 1.35]	1.16** [1.09, 1.24]	1.34** [1.29, 1.39]	1.27** [1.19, 1.36]	1.58** [1.51, 1.64]			1.11** [1.04, 1.18]	1.27** [1.22, 1.32]			1.11** [1.04, 1.18]	1.27** [1.22, 1.32]			1.11** [1.04, 1.18]	1.27** [1.22, 1.32]	1.11** [1.04, 1.18]
Ethnicity: Black			0.96 [0.89, 1.02]	0.94** [0.91, 0.98]			0.94 [0.88, 1.00]	0.91** [0.88, 0.95]			0.97 [0.91, 1.04]	0.95** [0.92, 0.99]	0.96 [0.90, 1.03]	0.96* [0.92, 0.99]	0.99 [0.93, 1.06]	0.99 [0.96, 1.03]	1.13** [1.05, 1.21]	1.20** [1.15, 1.24]			0.94 [0.88, 1.01]	0.91** [0.88, 0.94]			0.92* [0.86, 0.99]	0.89** [0.86, 0.93]			0.96 [0.90, 1.03]	0.92** [0.89, 0.96]	0.94 [0.88, 1.01]	0.92** [0.88, 0.95]	0.97 [0.91, 1.04]	0.95** [0.91, 0.98]	0.98 [0.91, 1.05]	1.10** [1.06, 1.14]			0.93* [0.87, 0.99]	0.89** [0.86, 0.92]			0.92* [0.86, 0.99]	0.88** [0.85, 0.92]			0.92* [0.86, 0.99]	0.89** [0.85, 0.92]	0.93* [0.86, 0.99]
Ethnicity: Other			1.08 [0.96, 1.21]	0.95 [0.89, 1.02]			1.06 [0.94, 1.18]	0.92* [0.86, 0.99]			1.09 [0.97, 1.22]	0.95 [0.89, 1.02]	1.09 [0.97, 1.22]	0.97 [0.90, 1.03]	1.11 [0.99, 1.25]	0.99 [0.93, 1.06]	1.40** [1.24, 1.58]	1.25** [1.16, 1.34]			1.09 [0.97, 1.22]	0.95 [0.89, 1.01]			1.03 [0.92, 1.16]	0.87** [0.81, 0.93]			1.12 [1.00, 1.25]	0.97 [0.91, 1.04]	1.09 [0.98, 1.23]	0.93* [0.87, 1.00]	1.17** [1.04, 1.31]	1.00 [0.93, 1.07]	1.27** [1.13, 1.43]	1.17** [1.09, 1.26]			1.02 [0.91, 1.14]	0.88** [0.82, 0.94]			1.01 [0.90, 1.13]	0.87** [0.81, 0.93]			1.01 [0.91, 1.14]	0.88** [0.82, 0.94]	1.00 [0.90, 1.13]
Education (ref: not having a degree): Having a degree																	0.49** [0.46, 0.51]	0.46** [0.45, 0.47]																	0.51** [0.48, 0.53]	0.47** [0.46, 0.49]
Economic activity (25) (ref: employed): Unemployed																	10.72** [10.23, 11.24]	1.76** [1.67, 1.85]																	10.06** [9.60, 10.55]	1.67** [1.59, 1.76]
Economic activity (25): Inactive																	1.40** [1.31, 1.49]	5.96** [5.82, 6.11]																	1.42** [1.34, 1.51]	5.96** [5.81, 6.10]
Long-term illness (32) (ref: no long-term illness): long-term illness																	3.71** [3.55, 3.88]	2.14** [2.08, 2.19]																	2.79** [2.66, 2.94]	2.32** [2.25, 2.39]
Mother's education (13) (ref: not having a degree): Having a degree			1.28** [1.17, 1.39]	0.87** [0.83, 0.92]			1.28** [1.17, 1.39]	0.87** [0.83, 0.91]			1.28** [1.18, 1.40]	0.89** [0.85, 0.93]	1.27** [1.17, 1.39]	0.87** [0.83, 0.91]	1.27** [1.17, 1.39]	0.88** [0.84, 0.92]	1.39** [1.27, 1.52]	1.05 [1.00, 1.10]			1.28** [1.17, 1.40]	0.88** [0.84, 0.92]			1.29** [1.18, 1.40]	0.88** [0.84, 0.92]			1.28** [1.17, 1.40]	0.88** [0.84, 0.93]	1.28** [1.17, 1.40]	0.87** [0.83, 0.92]	1.27** [1.17, 1.39]	0.87** [0.83, 0.91]	1.50** [1.37, 1.64]	1.06* [1.01, 1.12]			1.28** [1.17, 1.40]	0.88** [0.84, 0.93]			1.27** [1.17, 1.39]	0.88** [0.83, 0.92]			1.28** [1.17, 1.40]	0.88** [0.84, 0.93]	1.27** [1.16, 1.39]
Father's education (13) (ref: not having a degree): Having a degree			0.52** [0.47, 0.58]	1.07** [1.02, 1.11]			0.52** [0.47, 0.57]	1.06** [1.02, 1.11]			0.53** [0.48, 0.58]	1.07** [1.03, 1.12]	0.52** [0.47, 0.58]	1.07** [1.02, 1.11]	0.53** [0.48, 0.58]	1.07** [1.03, 1.12]	0.63** [0.57, 0.69]	1.21** [1.16, 1.27]			0.53** [0.48, 0.58]	1.07** [1.03, 1.12]			0.52** [0.47, 0.57]	1.06** [1.02, 1.11]			0.53** [0.48, 0.59]	1.09** [1.04, 1.13]	0.53** [0.48, 0.58]	1.07** [1.03, 1.12]	0.54** [0.49, 0.59]	1.10** [1.05, 1.14]	0.62** [0.56, 0.69]	1.23** [1.18, 1.29]			0.52** [0.47, 0.57]	1.05* [1.01, 1.10]			0.52** [0.47, 0.57]	1.06** [1.01, 1.10]			0.51** [0.46, 0.56]	1.05* [1.01, 1.09]	0.52** [0.47, 0.57]
Mother's occupation level (13) (ref: not working): routine/semi-routine			0.48** [0.45, 0.51]	0.75** [0.72, 0.77]			0.48** [0.46, 0.51]	0.75** [0.73, 0.78]			0.48** [0.45, 0.51]	0.74** [0.72, 0.77]	0.48** [0.45, 0.51]	0.75** [0.72, 0.77]	0.47** [0.45, 0.50]	0.74** [0.71, 0.76]	0.48** [0.45, 0.51]	0.75** [0.72, 0.77]			0.48** [0.45, 0.51]	0.75** [0.72, 0.78]			0.49** [0.46, 0.52]	0.77** [0.74, 0.79]			0.48** [0.45, 0.51]	0.75** [0.73, 0.78]	0.48** [0.45, 0.51]	0.75** [0.73, 0.78]	0.48** [0.45, 0.51]	0.75** [0.72, 0.77]	0.49** [0.46, 0.52]	0.77** [0.74, 0.80]			0.49** [0.46, 0.52]	0.76** [0.73, 0.79]			0.49** [0.46, 0.52]	0.77** [0.74, 0.79]			0.47** [0.44, 0.50]	0.75** [0.72, 0.78]	0.49** [0.46, 0.52]
Mother's occupation level (13): middle level			0.48** [0.45, 0.51]	0.53** [0.51, 0.55]			0.48** [0.45, 0.52]	0.54** [0.52, 0.56]			0.48** [0.45, 0.51]	0.53** [0.51, 0.55]	0.48** [0.45, 0.51]	0.53** [0.51, 0.55]	0.47** [0.44, 0.51]	0.53** [0.51, 0.55]	0.58** [0.54, 0.62]	0.60** [0.58, 0.63]			0.49** [0.46, 0.52]	0.55** [0.52, 0.57]			0.49** [0.46, 0.52]	0.55** [0.53, 0.57]			0.49** [0.46, 0.52]	0.55** [0.52, 0.57]	0.49** [0.46, 0.52]	0.55** [0.53, 0.57]	0.49** [0.46, 0.52]	0.55** [0.52, 0.57]	0.60** [0.56, 0.64]	0.63** [0.61, 0.66]			0.49** [0.46, 0.52]	0.54** [0.52, 0.56]			0.49** [0.46, 0.52]	0.55** [0.53, 0.57]			0.47** [0.44, 0.50]	0.54** [0.52, 0.56]	0.49** [0.46, 0.52]
Mother's occupation level (13): high			0.36** [0.33, 0.38]	0.43** [0.41, 0.45]			0.36** [0.33, 0.39]	0.44** [0.42, 0.46]			0.35** [0.32, 0.37]	0.42** [0.40, 0.44]	0.36** [0.33, 0.38]	0.43** [0.41, 0.45]	0.35** [0.32, 0.37]	0.42** [0.40, 0.44]	0.40** [0.37, 0.43]	0.48** [0.46, 0.50]			0.36** [0.34, 0.39]	0.44** [0.42, 0.46]			0.36** [0.33, 0.39]	0.44** [0.42, 0.46]			0.35** [0.33, 0.38]	0.43** [0.42, 0.45]	0.36** [0.34, 0.39]	0.44** [0.42, 0.46]	0.36** [0.33, 0.38]	0.43** [0.42, 0.45]	0.41** [0.38, 0.44]	0.50** [0.48, 0.52]			0.36** [0.33, 0.38]	0.44** [0.42, 0.46]			0.36** [0.33, 0.39]	0.44** [0.42, 0.46]			0.35** [0.32, 0.37]	0.43** [0.41, 0.45]	0.36** [0.33, 0.38]
Father's occupation level (13) (ref: not working): routine/semi-routine			0.80** [0.75, 0.86]	0.93** [0.89, 0.97]			0.80** [0.75, 0.86]	0.94** [0.90, 0.97]			0.80** [0.75, 0.86]	0.92** [0.89, 0.96]	0.80** [0.75, 0.86]	0.93** [0.89, 0.97]	0.80** [0.74, 0.85]	0.92** [0.88, 0.96]	0.71** [0.66, 0.76]	0.96 [0.91, 1.00]			0.80** [0.75, 0.86]	0.93** [0.89, 0.97]			0.81** [0.75, 0.86]	0.94** [0.90, 0.98]			0.78** [0.73, 0.84]	0.91** [0.87, 0.95]	0.80** [0.75, 0.86]	0.93** [0.89, 0.97]	0.78** [0.73, 0.84]	0.91** [0.87, 0.95]	0.71** [0.66, 0.76]	0.95* [0.91, 0.99]			0.80** [0.75, 0.86]	0.94** [0.90, 0.98]			0.80** [0.75, 0.86]	0.94** [0.90, 0.98]			0.78** [0.73, 0.84]	0.92** [0.89, 0.96]	0.80** [0.75, 0.86]
Father's occupation level (13): middle level			0.70** [0.66, 0.75]	0.78** [0.74, 0.81]			0.70** [0.65, 0.75]	0.77** [0.74, 0.80]			0.71** [0.66, 0.76]	0.78** [0.75, 0.81]	0.70** [0.66, 0.75]	0.78** [0.74, 0.81]	0.71** [0.66, 0.76]	0.78** [0.75, 0.81]	0.68** [0.63, 0.73]	0.85** [0.81, 0.89]			0.70** [0.65, 0.75]	0.77** [0.74, 0.80]			0.70** [0.65, 0.75]	0.77** [0.74, 0.80]			0.71** [0.66, 0.76]	0.78** [0.75, 0.81]	0.70** [0.65, 0.75]	0.77** [0.74, 0.80]	0.71** [0.66, 0.76]	0.78** [0.75, 0.81]	0.68** [0.63, 0.73]	0.85** [0.81, 0.89]			0.70** [0.65, 0.75]	0.77** [0.74, 0.80]			0.70** [0.65, 0.75]	0.77** [0.74, 0.80]			0.70** [0.66, 0.75]	0.77** [0.74, 0.81]	0.70** [0.65, 0.75]
Father's occupation level (13): high			0.45** [0.42, 0.49]	0.57** [0.55, 0.60]			0.45** [0.42, 0.49]	0.57** [0.55, 0.60]			0.44** [0.41, 0.48]	0.56** [0.54, 0.59]	0.45** [0.42, 0.49]	0.57** [0.55, 0.60]	0.45** [0.41, 0.48]	0.56** [0.54, 0.59]	0.52** [0.48, 0.56]	0.75** [0.71, 0.78]			0.45** [0.42, 0.49]	0.57** [0.55, 0.60]			0.45** [0.42, 0.49]	0.57** [0.55, 0.60]			0.45** [0.42, 0.49]	0.58** [0.55, 0.60]	0.45** [0.42, 0.49]	0.57** [0.55, 0.60]	0.45** [0.42, 0.49]	0.57** [0.55, 0.60]	0.52** [0.48, 0.57]	0.76** [0.73, 0.80]			0.45** [0.42, 0.49]	0.57** [0.55, 0.60]			0.45** [0.41, 0.48]	0.57** [0.54, 0.59]			0.45** [0.42, 0.49]	0.57** [0.55, 0.60]	0.45** [0.41, 0.48]
LogLikelihood		-9.19816e+06		-8.89977e+06		-9.22555e+06		-8.93827e+06		-9.1519e+06		-8.83978e+06		-8.88767e+06		-8.80107e+06		-7.75979e+06		-9.18933e+06		-8.90582e+06		-9.24833e+06		-8.96073e+06		-9.05772e+06		-8.77794e+06		-8.89973e+06		-8.74273e+06		-7.78457e+06		-9.25689e+06		-8.96728e+06		-9.25806e+06		-8.96751e+06		-9.17922e+06		-8.88858e+06
McFadden_R2		0.00690522		0.0391213		0.00394809		0.0349643		0.0118996		0.0455976		0.0404278		0.0497777		0.162201		0.00785851		0.0384675		0.00148836		0.0325399		0.0220676		0.0522749		0.0391255		0.0560764		0.159525		0.000563744		0.0318317		0.000438117		0.0318072		0.00894941		0.0403292
[truncated: 5 more columns]

## Sheet: supplimentary Table 3c
Male only
Independent variable:	Long-term illness																		Self-rated general health																		Mental health
	Childhood only		Childhood only adjusted		Adolescence only		Adolescence only adjusted		Early adulthood only		Early adulthood only adjusted		Childhood + Adolescence adjusted		Three stage adjusted		Adjusted (sensitivity test)		Childhood only		Childhood only adjusted		Adolescence only		Adolescence only adjusted		Early adulthood only		Early adulthood only adjusted		Childhood + Adolescence adjusted		Three stage adjusted		Adjusted (sensitivity test)		Childhood only		Childhood only adjusted		Adolescence only		Adolescence only adjusted		Early adulthood only		Early adulthood only adjusted		Childhood + Adolescence adjusted
Activity (ref: employment)	Unemployment	Inactivity	Unemployment	Inactivity	Unemployment	Inactivity	Unemployment	Inactivity	Unemployment	Inactivity	Unemployment	Inactivity	Unemployment	Inactivity	Unemployment	Inactivity	Unemployment	Inactivity	Unemployment	Inactivity	Unemployment	Inactivity	Unemployment	Inactivity	Unemployment	Inactivity	Unemployment	Inactivity	Unemployment	Inactivity	Unemployment	Inactivity	Unemployment	Inactivity	Unemployment	Inactivity	Unemployment	Inactivity	Unemployment	Inactivity	Unemployment	Inactivity	Unemployment	Inactivity	Unemployment	Inactivity	Unemployment	Inactivity	Unemployment
(Intercept)	0.02** [0.02, 0.02]	0.04** [0.04, 0.04]	0.03** [0.02, 0.03]	0.07** [0.06, 0.07]	0.02** [0.02, 0.02]	0.04** [0.04, 0.04]	0.03** [0.03, 0.03]	0.08** [0.07, 0.08]	0.02** [0.02, 0.02]	0.03** [0.03, 0.03]	0.02** [0.02, 0.03]	0.06** [0.06, 0.07]	0.03** [0.02, 0.03]	0.07** [0.06, 0.07]	0.02** [0.02, 0.02]	0.05** [0.05, 0.06]	0.01** [0.01, 0.02]	0.04** [0.03, 0.04]	0.02** [0.02, 0.02]	0.04** [0.04, 0.04]	0.03** [0.03, 0.03]	0.08** [0.07, 0.08]	0.03** [0.02, 0.03]	0.05** [0.04, 0.05]	0.03** [0.03, 0.03]	0.09** [0.08, 0.09]	0.02** [0.02, 0.02]	0.04** [0.04, 0.04]	0.03** [0.02, 0.03]	0.07** [0.06, 0.07]	0.03** [0.03, 0.03]	0.08** [0.07, 0.08]	0.02** [0.02, 0.03]	0.06** [0.06, 0.07]	0.02** [0.01, 0.02]	0.05** [0.04, 0.05]	0.02** [0.02, 0.02]	0.04** [0.04, 0.04]	0.03** [0.03, 0.03]	0.08** [0.08, 0.09]	0.02** [0.02, 0.02]	0.04** [0.04, 0.04]	0.03** [0.03, 0.03]	0.08** [0.08, 0.09]	0.02** [0.02, 0.02]	0.04** [0.04, 0.04]	0.02** [0.02, 0.03]	0.07** [0.07, 0.08]	0.03** [0.02, 0.03]
Childhood	1.88** [1.80, 1.97]	2.97** [2.87, 3.06]	1.87** [1.78, 1.96]	2.95** [2.85, 3.05]									1.77** [1.68, 1.86]	2.43** [2.35, 2.52]	1.48** [1.40, 1.55]	1.89** [1.82, 1.96]	1.16** [1.10, 1.22]	1.49** [1.43, 1.55]	2.75** [2.59, 2.93]	3.97** [3.81, 4.14]	2.75** [2.58, 2.93]	3.96** [3.80, 4.13]									2.74** [2.57, 2.92]	3.73** [3.58, 3.90]	2.13** [1.99, 2.27]	2.59** [2.48, 2.71]	1.37** [1.27, 1.47]	1.72** [1.64, 1.81]	1.87** [1.78, 1.98]	1.81** [1.74, 1.89]	1.91** [1.81, 2.01]	1.86** [1.78, 1.93]									1.75** [1.66, 1.85]
Adolescence					1.75** [1.63, 1.87]	3.46** [3.32, 3.61]	1.72** [1.60, 1.85]	3.41** [3.27, 3.56]					1.31** [1.22, 1.41]	2.22** [2.12, 2.33]	0.99 [0.92, 1.07]	1.55** [1.48, 1.63]	0.67** [0.62, 0.73]	1.28** [1.21, 1.34]					1.14** [1.04, 1.26]	2.26** [2.14, 2.39]	1.17** [1.06, 1.29]	2.29** [2.17, 2.42]					1.03 [0.94, 1.14]	1.90** [1.80, 2.01]	0.87** [0.79, 0.96]	1.49** [1.41, 1.58]	0.74** [0.67, 0.82]	1.21** [1.14, 1.29]					1.50** [1.42, 1.58]	1.71** [1.64, 1.77]	1.59** [1.50, 1.67]	1.81** [1.74, 1.88]					1.40** [1.32, 1.48]
Early Adulthood									3.52** [3.36, 3.69]	5.71** [5.53, 5.90]	3.64** [3.47, 3.81]	5.84** [5.66, 6.04]			3.34** [3.18, 3.50]	4.63** [4.47, 4.79]	1.72** [1.62, 1.82]	1.77** [1.69, 1.84]									4.66** [4.41, 4.91]	7.67** [7.40, 7.96]	4.52** [4.28, 4.78]	7.35** [7.09, 7.63]			4.06** [3.84, 4.29]	6.06** [5.83, 6.30]	1.48** [1.38, 1.58]	2.47** [2.36, 2.59]									2.66** [2.54, 2.78]	2.63** [2.54, 2.72]	2.65** [2.54, 2.77]	2.61** [2.52, 2.70]
Ethnicity (ref: White): Mixed			1.23** [1.12, 1.34]	0.79** [0.73, 0.86]			1.20** [1.10, 1.31]	0.76** [0.71, 0.83]			1.21** [1.10, 1.32]	0.77** [0.71, 0.83]	1.22** [1.12, 1.34]	0.79** [0.73, 0.86]	1.22** [1.12, 1.34]	0.79** [0.73, 0.86]	1.09 [0.99, 1.20]	0.83** [0.77, 0.90]			1.20** [1.09, 1.31]	0.76** [0.70, 0.82]			1.20** [1.10, 1.31]	0.77** [0.71, 0.83]			1.23** [1.12, 1.34]	0.79** [0.73, 0.85]	1.20** [1.09, 1.31]	0.77** [0.71, 0.83]	1.22** [1.12, 1.34]	0.79** [0.73, 0.86]	1.08 [0.98, 1.19]	0.81** [0.75, 0.88]			1.16** [1.06, 1.27]	0.74** [0.68, 0.80]			1.17** [1.07, 1.28]	0.73** [0.68, 0.79]			1.18** [1.08, 1.29]	0.75** [0.69, 0.81]	1.15** [1.05, 1.26]
Ethnicity: Indian			0.58** [0.52, 0.64]	0.47** [0.43, 0.51]			0.55** [0.49, 0.61]	0.44** [0.40, 0.48]			0.57** [0.51, 0.63]	0.45** [0.42, 0.49]	0.58** [0.52, 0.64]	0.48** [0.44, 0.52]	0.59** [0.53, 0.65]	0.49** [0.45, 0.54]	0.76** [0.68, 0.85]	0.73** [0.66, 0.79]			0.52** [0.47, 0.58]	0.39** [0.36, 0.43]			0.54** [0.48, 0.60]	0.41** [0.38, 0.45]			0.57** [0.51, 0.64]	0.46** [0.42, 0.50]	0.52** [0.47, 0.58]	0.39** [0.36, 0.42]	0.56** [0.50, 0.62]	0.44** [0.40, 0.48]	0.66** [0.59, 0.74]	0.57** [0.52, 0.62]			0.54** [0.49, 0.60]	0.42** [0.38, 0.46]			0.54** [0.48, 0.59]	0.41** [0.38, 0.45]			0.56** [0.51, 0.63]	0.43** [0.40, 0.47]	0.54** [0.48, 0.60]
Ethnicity: Pakistani/Bangladeshi			1.06 [0.98, 1.15]	0.99 [0.93, 1.05]			1.01 [0.93, 1.09]	0.91** [0.86, 0.97]			1.11* [1.02, 1.20]	1.02 [0.96, 1.09]	1.07 [0.98, 1.16]	1.00 [0.94, 1.06]	1.15** [1.06, 1.25]	1.11** [1.05, 1.18]	1.29** [1.18, 1.40]	1.39** [1.31, 1.48]			0.97 [0.90, 1.06]	0.83** [0.79, 0.88]			0.99 [0.91, 1.07]	0.85** [0.80, 0.90]			1.02 [0.94, 1.10]	0.90** [0.85, 0.95]	0.97 [0.90, 1.06]	0.84** [0.79, 0.89]	1.00 [0.92, 1.09]	0.89** [0.84, 0.94]	1.10* [1.01, 1.19]	1.02 [0.96, 1.09]			0.98 [0.90, 1.06]	0.85** [0.80, 0.90]			0.97 [0.89, 1.05]	0.83** [0.78, 0.88]			1.02 [0.94, 1.11]	0.88** [0.83, 0.93]	0.97 [0.89, 1.05]
Ethnicity: Black			1.09* [1.02, 1.17]	0.80** [0.75, 0.84]			1.05 [0.98, 1.13]	0.74** [0.70, 0.79]			1.15** [1.07, 1.23]	0.84** [0.80, 0.89]	1.10* [1.02, 1.18]	0.81** [0.76, 0.85]	1.18** [1.10, 1.27]	0.89** [0.84, 0.95]	1.26** [1.17, 1.36]	1.05 [0.99, 1.12]			1.06 [0.98, 1.13]	0.74** [0.70, 0.78]			1.04 [0.97, 1.11]	0.72** [0.68, 0.76]			1.07* [1.00, 1.15]	0.76** [0.71, 0.80]	1.06 [0.99, 1.13]	0.74** [0.70, 0.79]	1.09* [1.01, 1.17]	0.78** [0.73, 0.82]	1.20** [1.11, 1.29]	0.89** [0.84, 0.95]			1.03 [0.96, 1.11]	0.71** [0.67, 0.76]			1.03 [0.96, 1.11]	0.71** [0.67, 0.75]			1.07 [1.00, 1.15]	0.74** [0.70, 0.78]	1.03 [0.96, 1.11]
Ethnicity: Other			1.32** [1.18, 1.49]	1.41** [1.30, 1.54]			1.23** [1.09, 1.38]	1.22** [1.12, 1.33]			1.35** [1.20, 1.52]	1.41** [1.30, 1.54]	1.32** [1.17, 1.48]	1.40** [1.28, 1.52]	1.42** [1.26, 1.59]	1.56** [1.43, 1.70]	1.48** [1.31, 1.67]	1.55** [1.41, 1.70]			1.18** [1.05, 1.33]	1.14** [1.05, 1.24]			1.21** [1.08, 1.36]	1.17** [1.08, 1.27]			1.18** [1.05, 1.33]	1.13** [1.04, 1.23]	1.18** [1.05, 1.32]	1.13** [1.04, 1.23]	1.15* [1.02, 1.29]	1.08 [0.99, 1.18]	1.21** [1.07, 1.37]	1.04 [0.95, 1.14]			1.20** [1.07, 1.35]	1.17** [1.08, 1.27]			1.21** [1.07, 1.36]	1.18** [1.08, 1.28]			1.22** [1.09, 1.37]	1.19** [1.09, 1.29]	1.20** [1.06, 1.34]
Education (ref: not having a degree): Having a degree																	0.44** [0.41, 0.46]	0.46** [0.44, 0.48]																	0.47** [0.45, 0.50]	0.49** [0.47, 0.51]
Economic activity (25) (ref: employed): Unemployed																	12.56** [11.96, 13.18]	1.54** [1.44, 1.65]																	12.52** [11.92, 13.14]	1.66** [1.55, 1.77]
Economic activity (25): Inactive																	2.59** [2.40, 2.79]	6.47** [6.22, 6.73]																	2.74** [2.55, 2.95]	7.31** [7.03, 7.60]
Long-term illness (32) (ref: no long-term illness): long-term illness																	2.55** [2.42, 2.68]	3.84** [3.70, 3.98]																	3.73** [3.53, 3.94]	3.36** [3.23, 3.50]
Mother's education (13) (ref: not having a degree): Having a degree			1.00 [0.91, 1.10]	0.88** [0.82, 0.94]			1.01 [0.92, 1.10]	0.88** [0.83, 0.95]			0.98 [0.89, 1.07]	0.84** [0.79, 0.90]	1.00 [0.91, 1.10]	0.88** [0.83, 0.95]	0.98 [0.89, 1.07]	0.86** [0.80, 0.92]	1.11* [1.01, 1.22]	0.98 [0.92, 1.06]			1.02 [0.93, 1.12]	0.90** [0.84, 0.96]			1.00 [0.91, 1.10]	0.87** [0.81, 0.93]			0.97 [0.88, 1.07]	0.83** [0.77, 0.89]	1.02 [0.93, 1.12]	0.88** [0.82, 0.94]	0.98 [0.90, 1.08]	0.83** [0.78, 0.89]	1.08 [0.98, 1.19]	0.96 [0.90, 1.03]			0.97 [0.89, 1.07]	0.86** [0.80, 0.92]			0.98 [0.89, 1.07]	0.85** [0.79, 0.91]			0.99 [0.90, 1.09]	0.87** [0.81, 0.93]	0.96 [0.87, 1.05]
Father's education (13) (ref: not having a degree): Having a degree			0.90* [0.83, 0.98]	0.97 [0.91, 1.03]			0.89** [0.81, 0.97]	0.93* [0.87, 0.99]			0.88** [0.80, 0.96]	0.93* [0.87, 0.99]	0.90* [0.82, 0.98]	0.94 [0.89, 1.00]	0.88** [0.81, 0.96]	0.92* [0.87, 0.98]	1.04 [0.95, 1.14]	0.99 [0.93, 1.06]			0.91* [0.83, 0.99]	0.99 [0.93, 1.05]			0.90* [0.82, 0.98]	0.96 [0.90, 1.02]			0.93 [0.85, 1.01]	1.02 [0.96, 1.09]	0.91* [0.83, 0.99]	0.99 [0.93, 1.05]	0.93 [0.86, 1.02]	1.04 [0.98, 1.11]	1.08 [0.99, 1.18]	1.05 [0.98, 1.12]			0.88** [0.81, 0.96]	0.94 [0.89, 1.00]			0.88** [0.81, 0.96]	0.94* [0.88, 1.00]			0.90* [0.83, 0.98]	0.97 [0.91, 1.03]	0.87** [0.80, 0.95]
Mother's occupation level (13) (ref: not working): routine/semi-routine			1.24** [1.16, 1.33]	0.87** [0.83, 0.92]			1.24** [1.16, 1.33]	0.87** [0.82, 0.91]			1.27** [1.19, 1.37]	0.91** [0.86, 0.96]	1.24** [1.15, 1.33]	0.86** [0.81, 0.90]	1.27** [1.18, 1.36]	0.89** [0.84, 0.94]	1.31** [1.21, 1.40]	0.89** [0.85, 0.94]			1.23** [1.15, 1.32]	0.86** [0.81, 0.90]			1.25** [1.17, 1.34]	0.89** [0.84, 0.94]			1.27** [1.18, 1.36]	0.90** [0.86, 0.95]	1.23** [1.14, 1.32]	0.87** [0.82, 0.91]	1.25** [1.16, 1.34]	0.89** [0.84, 0.94]	1.34** [1.24, 1.44]	0.91** [0.86, 0.96]			1.26** [1.17, 1.35]	0.89** [0.84, 0.94]			1.25** [1.17, 1.34]	0.88** [0.84, 0.93]			1.27** [1.18, 1.36]	0.89** [0.85, 0.94]	1.26** [1.17, 1.35]
Mother's occupation level (13): middle level			0.77** [0.71, 0.84]	0.61** [0.57, 0.64]			0.78** [0.72, 0.84]	0.61** [0.58, 0.65]			0.79** [0.73, 0.86]	0.63** [0.60, 0.67]	0.77** [0.72, 0.84]	0.61** [0.58, 0.65]	0.79** [0.73, 0.86]	0.63** [0.60, 0.67]	0.94 [0.87, 1.02]	0.72** [0.68, 0.76]			0.76** [0.70, 0.82]	0.59** [0.55, 0.62]			0.77** [0.72, 0.84]	0.60** [0.57, 0.64]			0.78** [0.72, 0.84]	0.62** [0.58, 0.66]	0.76** [0.70, 0.82]	0.59** [0.55, 0.62]	0.77** [0.71, 0.83]	0.60** [0.57, 0.64]	0.93 [0.86, 1.01]	0.70** [0.66, 0.75]			0.77** [0.71, 0.83]	0.60** [0.57, 0.64]			0.77** [0.71, 0.83]	0.60** [0.57, 0.64]			0.78** [0.72, 0.84]	0.61** [0.57, 0.64]	0.77** [0.71, 0.83]
Mother's occupation level (13): high			0.62** [0.57, 0.68]	0.66** [0.62, 0.70]			0.63** [0.57, 0.68]	0.66** [0.62, 0.70]			0.62** [0.57, 0.68]	0.66** [0.62, 0.70]	0.62** [0.57, 0.68]	0.65** [0.61, 0.69]	0.62** [0.57, 0.68]	0.65** [0.61, 0.69]	0.75** [0.69, 0.82]	0.73** [0.69, 0.78]			0.62** [0.57, 0.67]	0.65** [0.61, 0.69]			0.63** [0.58, 0.69]	0.68** [0.64, 0.72]			0.63** [0.58, 0.69]	0.68** [0.64, 0.72]	0.62** [0.57, 0.67]	0.65** [0.62, 0.70]	0.62** [0.57, 0.68]	0.67** [0.63, 0.71]	0.76** [0.69, 0.83]	0.75** [0.71, 0.80]			0.64** [0.59, 0.70]	0.68** [0.64, 0.72]			0.63** [0.58, 0.68]	0.67** [0.63, 0.71]			0.64** [0.58, 0.69]	0.68** [0.64, 0.72]	0.64** [0.59, 0.69]
Father's occupation level (13) (ref: not working): routine/semi-routine			1.19** [1.08, 1.31]	1.03 [0.96, 1.10]			1.20** [1.09, 1.32]	1.04 [0.98, 1.11]			1.16** [1.06, 1.28]	0.98 [0.92, 1.05]	1.19** [1.08, 1.31]	1.03 [0.96, 1.10]	1.16** [1.05, 1.27]	0.98 [0.92, 1.05]	1.08 [0.98, 1.19]	0.92* [0.85, 0.98]			1.23** [1.12, 1.35]	1.07* [1.00, 1.14]			1.20** [1.09, 1.32]	1.03 [0.97, 1.10]			1.17** [1.07, 1.29]	1.00 [0.93, 1.07]	1.22** [1.11, 1.34]	1.06 [0.99, 1.13]	1.19** [1.09, 1.31]	1.02 [0.95, 1.09]	1.09 [0.99, 1.21]	0.94 [0.87, 1.01]			1.19** [1.08, 1.31]	1.03 [0.97, 1.10]			1.20** [1.09, 1.32]	1.04 [0.97, 1.11]			1.20** [1.09, 1.32]	1.04 [0.97, 1.11]	1.19** [1.08, 1.31]
Father's occupation level (13): middle level			0.90* [0.82, 0.99]	0.72** [0.67, 0.77]			0.90* [0.82, 0.99]	0.72** [0.68, 0.77]			0.90* [0.82, 0.99]	0.70** [0.66, 0.75]	0.90* [0.82, 0.99]	0.72** [0.68, 0.77]	0.89* [0.81, 0.98]	0.71** [0.67, 0.76]	0.94 [0.85, 1.03]	0.75** [0.70, 0.80]			0.92 [0.84, 1.01]	0.74** [0.69, 0.79]			0.90* [0.82, 0.99]	0.71** [0.67, 0.76]			0.91 [0.83, 1.00]	0.73** [0.68, 0.78]	0.92 [0.84, 1.01]	0.73** [0.69, 0.78]	0.93 [0.85, 1.02]	0.74** [0.69, 0.79]	0.94 [0.85, 1.03]	0.76** [0.71, 0.82]			0.90* [0.82, 0.99]	0.71** [0.67, 0.76]			0.90* [0.82, 0.99]	0.71** [0.67, 0.76]			0.92 [0.84, 1.01]	0.73** [0.68, 0.77]	0.90* [0.82, 0.99]
Father's occupation level (13): high			0.74** [0.67, 0.81]	0.59** [0.55, 0.63]			0.74** [0.67, 0.81]	0.59** [0.55, 0.63]			0.73** [0.66, 0.80]	0.57** [0.53, 0.61]	0.74** [0.67, 0.82]	0.59** [0.55, 0.64]	0.73** [0.66, 0.80]	0.58** [0.54, 0.62]	0.90* [0.81, 1.00]	0.68** [0.63, 0.73]			0.75** [0.68, 0.83]	0.60** [0.56, 0.64]			0.73** [0.66, 0.81]	0.57** [0.53, 0.61]			0.74** [0.67, 0.82]	0.59** [0.55, 0.63]	0.75** [0.68, 0.83]	0.60** [0.56, 0.64]	0.76** [0.69, 0.84]	0.60** [0.56, 0.65]	0.92 [0.83, 1.02]	0.70** [0.65, 0.76]			0.72** [0.65, 0.80]	0.57** [0.53, 0.61]			0.72** [0.66, 0.80]	0.57** [0.53, 0.61]			0.74** [0.67, 0.82]	0.58** [0.54, 0.62]	0.72** [0.65, 0.79]
LogLikelihood		-5.87736e+06		-5.78035e+06		-5.91703e+06		-5.81838e+06		-5.70449e+06		-5.60215e+06		-5.75359e+06		-5.5496e+06		-4.90385e+06		-5.89038e+06		-5.79098e+06		-5.97022e+06		-5.86854e+06		-5.7104e+06		-5.62326e+06		-5.77994e+06		-5.57245e+06		-4.94514e+06		-5.95925e+06		-5.85632e+06		-5.96556e+06		-5.85965e+06		-5.87766e+06		-5.77889e+06
McFadden_R2		0.0185278		0.0347272		0.0119032		0.0283775		0.047396		0.0644847		0.0391964		0.0732613		0.181096		0.0163536		0.0329531		0.00302099		0.0200012		0.0464088		0.0609597		0.0347962		0.069445		0.174202		0.00485334		0.022042		0.00379872		0.0214847		0.0184772		0.0349708
[truncated: 5 more columns]

## Sheet: supplimentary Table 4a
Independent variable:	Long-term illness						Self-rated general health						Mental health
	Unadjusted		Three stage adjusted		Adjusted (sensitivity test)		Unadjusted		Three stage adjusted		Adjusted (sensitivity test)		Unadjusted		Three stage adjusted		Adjusted (sensitivity test)
Activity (ref: employment)	Unemployment	Inactivity	Unemployment	Inactivity	Unemployment	Inactivity	Unemployment	Inactivity	Unemployment	Inactivity	Unemployment	Inactivity	Unemployment	Inactivity	Unemployment	Inactivity	Unemployment	Inactivity
(Intercept)	0.02** [0.02, 0.03]	0.06** [0.06, 0.07]	0.04** [0.02, 0.07]	0.07** [0.05, 0.10]	0.03** [0.01, 0.05]	0.05** [0.03, 0.07]	0.02** [0.02, 0.03]	0.07** [0.06, 0.07]	0.04** [0.03, 0.08]	0.08** [0.05, 0.11]	0.03** [0.02, 0.05]	0.05** [0.03, 0.08]	0.02** [0.02, 0.03]	0.07** [0.06, 0.07]	0.04** [0.03, 0.08]	0.08** [0.06, 0.12]	0.03** [0.01, 0.05]	0.05** [0.04, 0.08]
Accumulation	1.56** [1.34, 1.81]	1.85** [1.71, 2.02]	1.62** [1.39, 1.89]	1.94** [1.77, 2.12]	1.08 [0.90, 1.30]	1.35** [1.21, 1.50]	1.97** [1.65, 2.35]	2.39** [2.14, 2.66]	1.95** [1.63, 2.33]	2.29** [2.04, 2.57]	1.22 [0.98, 1.53]	1.51** [1.31, 1.74]	1.45** [1.28, 1.65]	1.43** [1.32, 1.55]	1.46** [1.28, 1.67]	1.34** [1.24, 1.46]	1.19* [1.03, 1.38]	1.15** [1.04, 1.27]
Gender (ref: male): female			1.33* [1.06, 1.67]	2.66** [2.23, 3.17]	1.27* [1.00, 1.61]	2.20** [1.82, 2.67]			1.27* [1.01, 1.59]	2.48** [2.08, 2.96]	1.32* [1.04, 1.66]	2.22** [1.84, 2.68]			1.17 [0.93, 1.49]	2.40** [2.01, 2.87]	1.21 [0.95, 1.55]	2.09** [1.73, 2.52]
Ethnicity (ref: White): Mixed			1.38 [0.85, 2.24]	0.92 [0.63, 1.34]	1.33 [0.79, 2.22]	0.94 [0.63, 1.41]			1.40 [0.86, 2.26]	0.94 [0.64, 1.36]	1.31 [0.78, 2.21]	0.93 [0.62, 1.39]			1.32 [0.82, 2.14]	0.89 [0.61, 1.28]	1.27 [0.76, 2.12]	0.89 [0.60, 1.33]
Ethnicity: Indian			0.74 [0.42, 1.29]	0.63* [0.44, 0.92]	1.00 [0.55, 1.81]	0.98 [0.66, 1.46]			0.69 [0.39, 1.20]	0.57** [0.39, 0.83]	0.89 [0.50, 1.61]	0.86 [0.58, 1.28]			0.68 [0.39, 1.18]	0.54** [0.37, 0.79]	0.89 [0.50, 1.61]	0.85 [0.58, 1.26]
Ethnicity: Pakistani/Bangladeshi			1.18 [0.74, 1.88]	1.33 [0.99, 1.79]	1.37 [0.84, 2.25]	1.61** [1.16, 2.22]			1.09 [0.69, 1.74]	1.18 [0.88, 1.58]	1.20 [0.73, 1.97]	1.38* [1.00, 1.90]			1.06 [0.67, 1.69]	1.13 [0.85, 1.51]	1.22 [0.74, 2.01]	1.37 [1.00, 1.88]
Ethnicity: Black			1.05 [0.68, 1.64]	0.96 [0.72, 1.27]	1.16 [0.73, 1.84]	1.14 [0.83, 1.57]			1.01 [0.65, 1.56]	0.89 [0.67, 1.18]	1.05 [0.67, 1.67]	1.02 [0.74, 1.39]			0.97 [0.62, 1.50]	0.83 [0.63, 1.10]	1.04 [0.66, 1.65]	0.99 [0.73, 1.34]
Ethnicity: Other			1.22 [0.61, 2.43]	1.15 [0.73, 1.81]	1.41 [0.68, 2.95]	1.34 [0.83, 2.17]			1.10 [0.55, 2.20]	1.01 [0.64, 1.59]	1.23 [0.59, 2.54]	1.13 [0.70, 1.83]			1.04 [0.52, 2.07]	0.93 [0.60, 1.46]	1.16 [0.55, 2.41]	1.09 [0.68, 1.74]
Education (ref: not having a degree): Having a degree					0.47** [0.34, 0.64]	0.46** [0.37, 0.56]					0.49** [0.36, 0.68]	0.48** [0.39, 0.59]					0.45** [0.33, 0.62]	0.43** [0.35, 0.53]
Economic activity (25) (ref: employed): Unemployed					11.48** [7.79, 16.92]	1.73** [1.18, 2.54]					11.43** [7.82, 16.72]	1.74** [1.19, 2.53]					12.18** [8.42, 17.63]	1.93** [1.32, 2.82]
Economic activity (25): Inactive					1.80* [1.13, 2.88]	6.33** [4.92, 8.14]					1.85* [1.15, 2.99]	6.54** [5.07, 8.43]					1.94** [1.21, 3.10]	7.31** [5.72, 9.33]
Long-term illness (32) (ref: no long-term illness): long-term illness					3.20** [2.46, 4.16]	2.61** [2.18, 3.14]					3.36** [2.48, 4.56]	2.84** [2.31, 3.49]					2.57** [1.98, 3.32]	1.90** [1.60, 2.24]
Mother's education (13) (ref: not having a degree): Having a degree			1.12 [0.66, 1.91]	0.87 [0.63, 1.21]	1.26 [0.73, 2.18]	1.02 [0.72, 1.44]			1.11 [0.65, 1.89]	0.85 [0.61, 1.19]	1.30 [0.74, 2.27]	1.03 [0.73, 1.46]			1.10 [0.65, 1.86]	0.86 [0.62, 1.19]	1.24 [0.71, 2.15]	1.03 [0.73, 1.45]
Father's education (13) (ref: not having a degree): Having a degree			0.68 [0.37, 1.26]	1.03 [0.74, 1.42]	0.82 [0.43, 1.55]	1.15 [0.81, 1.64]			0.70 [0.38, 1.28]	1.06 [0.77, 1.46]	0.82 [0.43, 1.54]	1.16 [0.82, 1.66]			0.66 [0.36, 1.22]	1.00 [0.73, 1.38]	0.80 [0.42, 1.52]	1.16 [0.82, 1.64]
Mother's occupation level (13) (ref: not working): routine/semi-routine			0.73 [0.49, 1.08]	0.78 [0.60, 1.01]	0.74 [0.49, 1.11]	0.79 [0.60, 1.04]			0.74 [0.50, 1.09]	0.80 [0.62, 1.03]	0.77 [0.51, 1.16]	0.82 [0.62, 1.08]			0.74 [0.51, 1.10]	0.80 [0.62, 1.03]	0.75 [0.49, 1.13]	0.81 [0.62, 1.07]
Mother's occupation level (13): middle level			0.57* [0.37, 0.89]	0.55** [0.41, 0.73]	0.69 [0.44, 1.09]	0.63** [0.46, 0.85]			0.58* [0.38, 0.90]	0.56** [0.43, 0.74]	0.70 [0.44, 1.12]	0.65** [0.48, 0.88]			0.57* [0.37, 0.89]	0.56** [0.42, 0.74]	0.70 [0.44, 1.11]	0.65** [0.48, 0.87]
Mother's occupation level (13): high			0.44** [0.26, 0.72]	0.48** [0.35, 0.66]	0.51* [0.30, 0.87]	0.55** [0.39, 0.76]			0.45** [0.27, 0.74]	0.50** [0.37, 0.68]	0.52* [0.31, 0.90]	0.57** [0.41, 0.80]			0.44** [0.27, 0.73]	0.50** [0.37, 0.68]	0.54* [0.31, 0.92]	0.58** [0.42, 0.81]
Father's occupation level (13) (ref: not working): routine/semi-routine			0.92 [0.55, 1.56]	0.95 [0.68, 1.34]	0.83 [0.47, 1.45]	0.96 [0.67, 1.39]			0.92 [0.55, 1.56]	0.95 [0.68, 1.34]	0.83 [0.48, 1.46]	0.96 [0.67, 1.39]			0.92 [0.54, 1.56]	0.96 [0.69, 1.35]	0.84 [0.48, 1.48]	0.98 [0.68, 1.42]
Father's occupation level (13): middle level			0.76 [0.45, 1.29]	0.76 [0.54, 1.06]	0.76 [0.43, 1.32]	0.82 [0.57, 1.18]			0.76 [0.45, 1.28]	0.75 [0.54, 1.06]	0.75 [0.43, 1.30]	0.82 [0.57, 1.18]			0.75 [0.45, 1.27]	0.75 [0.54, 1.04]	0.76 [0.44, 1.33]	0.82 [0.57, 1.18]
Father's occupation level (13): high			0.55* [0.32, 0.95]	0.57** [0.39, 0.84]	0.65 [0.36, 1.16]	0.73 [0.47, 1.11]			0.55* [0.32, 0.96]	0.58** [0.39, 0.85]	0.65 [0.36, 1.18]	0.75 [0.49, 1.14]			0.53* [0.31, 0.92]	0.56** [0.38, 0.83]	0.65 [0.36, 1.17]	0.74 [0.48, 1.13]
LogLikelihood		-303383		-289427		-254594		-301991		-289715		-255764		-307349		-294951		-259862
McFadden_R2		0.024633		0.0695014		0.181488		0.0291068		0.0685758		0.177727		0.0118813		0.0517424		0.16455

## Sheet: supplimentary Table 4b
Female only
Independent variable:	Long-term illness						Self-rated general health						Mental health
	Unadjusted		Three stage adjusted		Adjusted (sensitivity test)		Unadjusted		Three stage adjusted		Adjusted (sensitivity test)		Unadjusted		Three stage adjusted		Adjusted (sensitivity test)
Activity (ref: employment)	Unemployment	Inactivity	Unemployment	Inactivity	Unemployment	Inactivity	Unemployment	Inactivity	Unemployment	Inactivity	Unemployment	Inactivity	Unemployment	Inactivity	Unemployment	Inactivity	Unemployment	Inactivity
(Intercept)	0.03** [0.03, 0.03]	0.10** [0.10, 0.10]	0.08** [0.08, 0.09]	0.20** [0.19, 0.21]	0.05** [0.04, 0.05]	0.12** [0.11, 0.12]	0.03** [0.03, 0.03]	0.10** [0.10, 0.10]	0.08** [0.08, 0.09]	0.21** [0.20, 0.22]	0.06** [0.05, 0.06]	0.13** [0.12, 0.13]	0.03** [0.03, 0.03]	0.11** [0.11, 0.11]	0.08** [0.07, 0.08]	0.22** [0.21, 0.23]	0.05** [0.05, 0.05]	0.13** [0.12, 0.13]
Accumulation	1.38** [1.35, 1.42]	1.61** [1.59, 1.63]	1.48** [1.45, 1.52]	1.70** [1.67, 1.72]	1.00 [0.97, 1.03]	1.25** [1.23, 1.27]	1.73** [1.68, 1.77]	1.93** [1.91, 1.96]	1.76** [1.71, 1.81]	1.95** [1.92, 1.98]	1.24** [1.20, 1.28]	1.38** [1.36, 1.41]	1.30** [1.28, 1.33]	1.20** [1.19, 1.21]	1.35** [1.32, 1.38]	1.24** [1.22, 1.25]	1.16** [1.14, 1.19]	1.09** [1.08, 1.10]
Ethnicity (ref: White): Mixed			1.56** [1.45, 1.68]	1.00 [0.95, 1.05]	1.64** [1.51, 1.77]	1.02 [0.97, 1.08]			1.58** [1.47, 1.70]	1.02 [0.97, 1.07]	1.57** [1.46, 1.70]	1.01 [0.96, 1.07]			1.53** [1.42, 1.65]	0.98 [0.94, 1.03]	1.55** [1.43, 1.67]	0.99 [0.95, 1.05]
Ethnicity: Indian			0.88** [0.81, 0.96]	0.69** [0.66, 0.73]	1.31** [1.20, 1.43]	1.12** [1.06, 1.18]			0.85** [0.78, 0.92]	0.65** [0.62, 0.68]	1.14** [1.04, 1.25]	1.04 [0.98, 1.09]			0.82** [0.75, 0.89]	0.61** [0.58, 0.64]	1.13** [1.03, 1.24]	1.00 [0.95, 1.06]
Ethnicity: Pakistani/Bangladeshi			1.19** [1.12, 1.28]	1.42** [1.37, 1.48]	1.47** [1.37, 1.58]	1.71** [1.64, 1.78]			1.15** [1.07, 1.22]	1.33** [1.28, 1.38]	1.27** [1.18, 1.36]	1.57** [1.51, 1.64]			1.11** [1.04, 1.19]	1.27** [1.22, 1.32]	1.28** [1.19, 1.37]	1.54** [1.48, 1.60]
Ethnicity: Black			0.99 [0.93, 1.06]	0.99 [0.96, 1.03]	1.13** [1.05, 1.21]	1.20** [1.15, 1.24]			0.97 [0.91, 1.04]	0.94** [0.91, 0.98]	0.98 [0.91, 1.05]	1.10** [1.05, 1.14]			0.93* [0.87, 0.99]	0.89** [0.86, 0.92]	0.98 [0.91, 1.05]	1.07** [1.03, 1.12]
Ethnicity: Other			1.12 [1.00, 1.25]	1.00 [0.93, 1.07]	1.40** [1.24, 1.58]	1.25** [1.16, 1.34]			1.08 [0.96, 1.21]	0.95 [0.89, 1.01]	1.23** [1.09, 1.39]	1.15** [1.07, 1.23]			0.97 [0.86, 1.08]	0.85** [0.79, 0.91]	1.10 [0.97, 1.24]	1.09* [1.01, 1.17]
Education (ref: not having a degree): Having a degree					0.49** [0.46, 0.51]	0.46** [0.45, 0.47]					0.51** [0.48, 0.53]	0.47** [0.46, 0.49]					0.47** [0.45, 0.49]	0.44** [0.43, 0.45]
Economic activity (25) (ref: employed): Unemployed					10.62** [10.13, 11.13]	1.76** [1.67, 1.85]					10.31** [9.83, 10.80]	1.70** [1.62, 1.79]					11.12** [10.61, 11.65]	1.86** [1.77, 1.95]
Economic activity (25): Inactive					1.39** [1.31, 1.48]	5.96** [5.82, 6.11]					1.44** [1.35, 1.53]	6.02** [5.87, 6.16]					1.50** [1.41, 1.60]	6.52** [6.37, 6.68]
Long-term illness (32) (ref: no long-term illness): long-term illness					3.62** [3.47, 3.78]	2.15** [2.10, 2.20]					2.97** [2.83, 3.12]	2.45** [2.38, 2.52]					2.40** [2.30, 2.50]	1.69** [1.65, 1.73]
Mother's education (13) (ref: not having a degree): Having a degree			1.26** [1.16, 1.38]	0.87** [0.83, 0.91]	1.39** [1.27, 1.52]	1.05 [1.00, 1.10]			1.26** [1.15, 1.37]	0.86** [0.82, 0.90]	1.50** [1.37, 1.64]	1.06* [1.01, 1.12]			1.25** [1.14, 1.36]	0.87** [0.83, 0.92]	1.41** [1.28, 1.54]	1.07* [1.01, 1.12]
Father's education (13) (ref: not having a degree): Having a degree			0.52** [0.48, 0.58]	1.07** [1.03, 1.12]	0.63** [0.57, 0.69]	1.21** [1.16, 1.27]			0.53** [0.48, 0.58]	1.08** [1.03, 1.13]	0.62** [0.56, 0.68]	1.22** [1.17, 1.28]			0.51** [0.46, 0.56]	1.04 [1.00, 1.09]	0.62** [0.56, 0.68]	1.23** [1.17, 1.28]
Mother's occupation level (13) (ref: not working): routine/semi-routine			0.48** [0.45, 0.51]	0.74** [0.71, 0.76]	0.48** [0.45, 0.51]	0.75** [0.72, 0.77]			0.48** [0.46, 0.51]	0.75** [0.73, 0.78]	0.49** [0.46, 0.52]	0.77** [0.75, 0.80]			0.48** [0.46, 0.51]	0.76** [0.73, 0.79]	0.48** [0.45, 0.51]	0.77** [0.74, 0.80]
Mother's occupation level (13): middle level			0.47** [0.45, 0.51]	0.52** [0.50, 0.55]	0.58** [0.54, 0.62]	0.60** [0.58, 0.63]			0.49** [0.46, 0.52]	0.55** [0.53, 0.57]	0.60** [0.56, 0.64]	0.63** [0.61, 0.66]			0.48** [0.45, 0.51]	0.54** [0.52, 0.56]	0.59** [0.55, 0.64]	0.63** [0.60, 0.65]
Mother's occupation level (13): high			0.35** [0.33, 0.38]	0.42** [0.41, 0.44]	0.40** [0.37, 0.43]	0.48** [0.46, 0.50]			0.36** [0.33, 0.39]	0.44** [0.42, 0.46]	0.41** [0.38, 0.45]	0.50** [0.48, 0.52]			0.35** [0.33, 0.38]	0.43** [0.42, 0.45]	0.43** [0.40, 0.46]	0.50** [0.48, 0.53]
Father's occupation level (13) (ref: not working): routine/semi-routine			0.80** [0.74, 0.85]	0.92** [0.89, 0.96]	0.71** [0.66, 0.76]	0.96 [0.92, 1.00]			0.79** [0.74, 0.85]	0.92** [0.88, 0.96]	0.71** [0.66, 0.77]	0.95* [0.91, 1.00]			0.79** [0.74, 0.85]	0.93** [0.89, 0.97]	0.71** [0.66, 0.76]	0.96 [0.92, 1.01]
Father's occupation level (13): middle level			0.70** [0.66, 0.75]	0.78** [0.75, 0.81]	0.68** [0.63, 0.73]	0.85** [0.81, 0.89]			0.70** [0.65, 0.75]	0.77** [0.74, 0.80]	0.67** [0.63, 0.72]	0.84** [0.81, 0.88]			0.69** [0.65, 0.74]	0.77** [0.74, 0.80]	0.68** [0.63, 0.73]	0.85** [0.81, 0.88]
Father's occupation level (13): high			0.45** [0.41, 0.48]	0.57** [0.54, 0.59]	0.52** [0.48, 0.56]	0.75** [0.71, 0.78]			0.45** [0.42, 0.49]	0.57** [0.55, 0.60]	0.53** [0.48, 0.57]	0.76** [0.73, 0.80]			0.44** [0.41, 0.48]	0.56** [0.54, 0.59]	0.52** [0.48, 0.56]	0.75** [0.72, 0.79]
LogLikelihood		-9.12646e+06		-8.81525e+06		-7.76126e+06		-9.08525e+06		-8.80072e+06		-7.79217e+06		-9.22172e+06		-8.92416e+06		-7.88716e+06
McFadden_R2		0.0146464		0.0482468		0.162042		0.0190952		0.0498151		0.158705		0.00436152		0.0364872		0.148449

## Sheet: supplimentary Table 4c
Male only
Independent variable:	Long-term illness						Self-rated general health						Mental health
	Unadjusted		Three stage adjusted		Adjusted (sensitivity test)		Unadjusted		Three stage adjusted		Adjusted (sensitivity test)		Unadjusted		Three stage adjusted		Adjusted (sensitivity test)
Activity (ref: employment)	Unemployment	Inactivity	Unemployment	Inactivity	Unemployment	Inactivity	Unemployment	Inactivity	Unemployment	Inactivity	Unemployment	Inactivity	Unemployment	Inactivity	Unemployment	Inactivity	Unemployment	Inactivity
(Intercept)	0.02** [0.02, 0.02]	0.03** [0.03, 0.03]	0.02** [0.02, 0.03]	0.05** [0.05, 0.06]	0.01** [0.01, 0.02]	0.04** [0.03, 0.04]	0.02** [0.02, 0.02]	0.03** [0.03, 0.03]	0.02** [0.02, 0.03]	0.06** [0.06, 0.07]	0.02** [0.01, 0.02]	0.05** [0.04, 0.05]	0.02** [0.02, 0.02]	0.04** [0.04, 0.04]	0.02** [0.02, 0.03]	0.07** [0.06, 0.07]	0.01** [0.01, 0.01]	0.05** [0.04, 0.05]
Accumulation	1.77** [1.73, 1.82]	2.42** [2.38, 2.46]	1.79** [1.74, 1.83]	2.44** [2.40, 2.48]	1.15** [1.12, 1.18]	1.51** [1.48, 1.54]	2.32** [2.24, 2.39]	3.27** [3.20, 3.35]	2.31** [2.23, 2.39]	3.24** [3.17, 3.31]	1.23** [1.18, 1.28]	1.81** [1.77, 1.86]	1.66** [1.62, 1.70]	1.69** [1.66, 1.72]	1.68** [1.64, 1.73]	1.72** [1.69, 1.75]	1.27** [1.24, 1.31]	1.35** [1.32, 1.37]
Ethnicity (ref: White): Mixed			1.23** [1.13, 1.35]	0.80** [0.74, 0.87]	1.08 [0.98, 1.18]	0.83** [0.76, 0.90]			1.23** [1.13, 1.35]	0.80** [0.74, 0.87]	1.09 [0.99, 1.19]	0.81** [0.75, 0.88]			1.13** [1.03, 1.24]	0.71** [0.66, 0.77]	1.02 [0.93, 1.12]	0.72** [0.67, 0.79]
Ethnicity: Indian			0.60** [0.54, 0.66]	0.51** [0.47, 0.55]	0.75** [0.67, 0.84]	0.73** [0.67, 0.80]			0.53** [0.48, 0.59]	0.41** [0.38, 0.45]	0.66** [0.59, 0.74]	0.56** [0.51, 0.61]			0.55** [0.49, 0.61]	0.42** [0.39, 0.46]	0.68** [0.61, 0.76]	0.60** [0.55, 0.65]
Ethnicity: Pakistani/Bangladeshi			1.14** [1.05, 1.24]	1.10** [1.04, 1.17]	1.25** [1.15, 1.36]	1.39** [1.30, 1.48]			0.99 [0.92, 1.08]	0.87** [0.82, 0.93]	1.09* [1.00, 1.19]	1.01 [0.95, 1.07]			0.97 [0.90, 1.05]	0.84** [0.79, 0.89]	1.14** [1.05, 1.24]	1.06 [1.00, 1.13]
Ethnicity: Black			1.16** [1.08, 1.24]	0.87** [0.82, 0.93]	1.25** [1.16, 1.34]	1.05 [0.99, 1.12]			1.08* [1.01, 1.16]	0.77** [0.73, 0.82]	1.19** [1.11, 1.28]	0.89** [0.84, 0.94]			1.05 [0.97, 1.12]	0.72** [0.68, 0.76]	1.15** [1.07, 1.24]	0.83** [0.79, 0.89]
Ethnicity: Other			1.40** [1.24, 1.57]	1.54** [1.42, 1.68]	1.47** [1.30, 1.66]	1.55** [1.41, 1.69]			1.15* [1.02, 1.30]	1.08 [0.99, 1.17]	1.23** [1.09, 1.39]	1.05 [0.96, 1.15]			1.19** [1.06, 1.34]	1.15** [1.06, 1.25]	1.26** [1.12, 1.42]	1.05 [0.96, 1.15]
Education (ref: not having a degree): Having a degree					0.44** [0.41, 0.46]	0.46** [0.44, 0.48]					0.47** [0.45, 0.50]	0.48** [0.46, 0.50]					0.43** [0.41, 0.45]	0.41** [0.40, 0.43]
Economic activity (25) (ref: employed): Unemployed					12.47** [11.87, 13.09]	1.54** [1.44, 1.65]					12.69** [12.08, 13.32]	1.70** [1.59, 1.82]					13.16** [12.54, 13.81]	1.98** [1.85, 2.11]
Economic activity (25): Inactive					2.71** [2.52, 2.92]	6.59** [6.33, 6.85]					2.76** [2.57, 2.98]	7.47** [7.19, 7.76]					2.91** [2.71, 3.13]	9.09** [8.76, 9.43]
Long-term illness (32) (ref: no long-term illness): long-term illness					2.80** [2.67, 2.94]	3.99** [3.85, 4.13]					3.95** [3.74, 4.16]	3.63** [3.49, 3.78]					2.77** [2.65, 2.90]	2.35** [2.27, 2.43]
Mother's education (13) (ref: not having a degree): Having a degree			0.99 [0.90, 1.09]	0.87** [0.82, 0.94]	1.12* [1.02, 1.23]	0.98 [0.92, 1.06]			0.98 [0.89, 1.08]	0.83** [0.78, 0.89]	1.08 [0.98, 1.20]	0.96 [0.90, 1.03]			0.94 [0.85, 1.03]	0.82** [0.77, 0.88]	1.04 [0.94, 1.15]	0.96 [0.90, 1.03]
Father's education (13) (ref: not having a degree): Having a degree			0.88** [0.81, 0.96]	0.92* [0.87, 0.98]	1.05 [0.96, 1.15]	0.99 [0.93, 1.06]			0.93 [0.85, 1.01]	1.03 [0.97, 1.10]	1.07 [0.98, 1.17]	1.04 [0.98, 1.11]			0.86** [0.79, 0.94]	0.92* [0.87, 0.98]	1.01 [0.93, 1.11]	1.00 [0.94, 1.07]
Mother's occupation level (13) (ref: not working): routine/semi-routine			1.24** [1.16, 1.33]	0.86** [0.82, 0.91]	1.26** [1.17, 1.36]	0.89** [0.84, 0.94]			1.25** [1.17, 1.34]	0.89** [0.84, 0.94]	1.34** [1.24, 1.44]	0.90** [0.85, 0.95]			1.27** [1.18, 1.36]	0.90** [0.85, 0.94]	1.29** [1.20, 1.39]	0.91** [0.87, 0.96]
Mother's occupation level (13): middle level			0.78** [0.73, 0.85]	0.62** [0.59, 0.66]	0.92* [0.85, 0.99]	0.72** [0.67, 0.76]			0.76** [0.70, 0.82]	0.59** [0.56, 0.62]	0.93 [0.85, 1.00]	0.69** [0.65, 0.74]			0.77** [0.71, 0.83]	0.60** [0.57, 0.64]	0.91* [0.84, 0.99]	0.70** [0.66, 0.75]
Mother's occupation level (13): high			0.62** [0.57, 0.67]	0.64** [0.60, 0.68]	0.74** [0.68, 0.81]	0.73** [0.69, 0.78]			0.63** [0.57, 0.68]	0.67** [0.63, 0.71]	0.76** [0.70, 0.83]	0.75** [0.71, 0.80]			0.64** [0.59, 0.70]	0.69** [0.65, 0.73]	0.77** [0.70, 0.84]	0.78** [0.74, 0.83]
Father's occupation level (13) (ref: not working): routine/semi-routine			1.17** [1.07, 1.29]	1.00 [0.94, 1.07]	1.08 [0.98, 1.19]	0.92* [0.85, 0.98]			1.20** [1.09, 1.32]	1.03 [0.96, 1.10]	1.08 [0.98, 1.20]	0.94 [0.88, 1.01]			1.19** [1.08, 1.30]	1.03 [0.96, 1.10]	1.12* [1.02, 1.24]	0.98 [0.91, 1.05]
Father's occupation level (13): middle level			0.91* [0.82, 0.99]	0.72** [0.68, 0.77]	0.95 [0.86, 1.04]	0.75** [0.70, 0.80]			0.93 [0.84, 1.02]	0.74** [0.69, 0.79]	0.93 [0.85, 1.03]	0.76** [0.71, 0.81]			0.91* [0.82, 0.99]	0.71** [0.67, 0.76]	0.97 [0.88, 1.07]	0.77** [0.72, 0.82]
Father's occupation level (13): high			0.74** [0.67, 0.82]	0.59** [0.55, 0.63]	0.91 [0.82, 1.01]	0.68** [0.63, 0.73]			0.75** [0.68, 0.83]	0.60** [0.56, 0.64]	0.91 [0.82, 1.01]	0.70** [0.65, 0.75]			0.72** [0.65, 0.79]	0.56** [0.52, 0.60]	0.92 [0.83, 1.02]	0.69** [0.64, 0.75]
LogLikelihood		-5.70226e+06		-5.60522e+06		-4.91297e+06		-5.72043e+06		-5.62729e+06		-4.9553e+06		-5.88066e+06		-5.77431e+06		-5.06564e+06
McFadden_R2		0.0477683		0.0639725		0.179574		0.0447342		0.0602874		0.172504		0.0179768		0.035737		0.154079
